1 **Resolving the transcriptional transitions associated with**  
2 **oligodendrocyte generation from adult neural stem cells by**  
3 **single cell sequencing**

4 **Running Title: Oligodendroglial transcriptional networks**  
5  
6

7 Kasum Azim<sup>1\*</sup>, Filippo Calzolari<sup>2</sup>, Martina Cantone<sup>3</sup>, Rainer Akkermann<sup>1</sup>, Julio Vera<sup>4</sup>,  
8 Hans-Peter Hartung<sup>1</sup>, Onur Basak<sup>5</sup>, Arthur Morgan Butt<sup>6</sup>, Patrick Küry<sup>1\*</sup>

9 <sup>1</sup> Department of Neurology, Medical Faculty, Heinrich-Heine-University, 40225  
10 Düsseldorf, Germany.

11 <sup>2</sup> Institute for Physiological Chemistry, University Medical Centre of the Johannes  
12 Gutenberg University Mainz, Mainz, Germany.

13 <sup>3</sup> Faculty of Mechanical Engineering, Specialty Division for Systems Biotechnology,  
14 Technische Universität München, Germany.

15 <sup>4</sup> Laboratory of Systems Tumor Immunology, Department of Dermatology, Friedrich-  
16 Alexander-Universität Erlangen-Nürnberg, Erlangen, Germany.

17 <sup>5</sup> Department of Translational Neuroscience, UMC Utrecht Brain Centre, University  
18 Medical Centre Utrecht, Utrecht University, Utrecht, The Netherlands.

19 <sup>6</sup> Institute of Biomedical and Biomolecular Sciences, School of Pharmacy and  
20 Biomedical Science, University of Portsmouth, St Michael's Building, White Swan  
21 Road, Portsmouth, PO1 2DT, UK.

22 \* Corresponding Authors

23 Email: Kasum.Azim@med.uni-duesseldorf.de; [kuery@uni-duesseldorf.de](mailto:kuery@uni-duesseldorf.de).

24

## 25 **ACKNOWLEDGEMENTS**

26 We wish to thank Dominic Grün at the Max Planck Institute of Immunobiology and  
27 Epigenetics in Freiburg, DE for his valuable expertise with the pseudotime analysis.  
28 We also wish to thank Dr Marco Antonio Mendoza at Genoscope, FR, for  
29 establishment, guidance and optimization of TETRAMER.

30

31 **Word count: 13,928 (inc References and Figure Legends)**

32

## 33 **Abstract**

34 The subventricular zone (SVZ) is the largest neurogenic niche in the adult forebrain.  
35 Notably, neural stem cells (NSCs) of the SVZ generate not only neurons, but also  
36 oligodendrocytes, the myelin-forming cells of the central nervous system.  
37 Transcriptomic studies have provided detailed knowledge of the molecular events  
38 that regulate neurogenesis, but little is understood about adult oligodendrogenesis  
39 from SVZ-NSCs. To address this, we performed in-depth single-cell transcriptomic  
40 analyses to resolve the major differences in neuronal and oligodendroglial lineages  
41 derived from the adult SVZ. A hallmark of adult oligodendrogenesis was the stage-  
42 specific expression of transcriptional modulators that regulate developmental  
43 oligodendrogenesis. Notably, divergence of the oligodendroglial lineage was  
44 distinguished by Wnt-Notch and angiogenesis-related signaling, whereas G-protein-  
45 coupled receptor signaling pathways were the major signature observed in the  
46 neurogenic lineage. Moreover, in-depth gene regulatory network analysis identified  
47 key stage-specific master regulators of the oligodendrocyte lineage and revealed

48 new mechanisms by which signaling pathways interact with transcriptional networks  
49 to control lineage progression. Our work provides an integrated view of the multi-step  
50 differentiation process leading from NSCs to mature oligodendrocytes, by linking  
51 environmental signals to known and novel transcriptional mechanisms orchestrating  
52 oligodendrogenesis.

53 **Word count: 186**

54

55 **Keywords:** Oligodendrogenesis; Gene Regulatory Networks; Transcription Factors;  
56 Signaling Pathways; Neural Stem Cell; Single Cell Sequencing.

57

58 **Main points:**

59 • Distinct adult NSC populations giving rise to either oligodendrocytes or neurons  
60 can be identified by the expression of transcription factors.

61 • Gene regulatory control of oligodendrogenesis is a major fate-determinant for their  
62 generation.

63

## 64 INTRODUCTION

65 Oligodendrocytes are the myelin-forming cells of the central nervous system (CNS),  
66 and provide insulation for rapid axonal conduction and support to axons. In the  
67 forebrain, most oligodendrocytes are generated shortly after birth from neural stem  
68 cells (NSCs) of the subventricular zone (SVZ) (Azim, Berninger, & Raineteau, 2016;  
69 Kessar et al., 2006), which are also responsible for neurogenesis (Figueres-Onate,  
70 Sanchez-Villalon, Sanchez-Gonzalez, & Lopez-Mascaraque, 2019), and this activity  
71 is retained well into late adulthood (Fuentealba et al., 2015). The sequence of  
72 oligodendroglial differentiation is relatively similar in postnatal and adult SVZ (Azim  
73 et al., 2016; El Waly, Macchi, Cayre, & Durbec, 2014), whereby NSCs first generate  
74 transiently amplifying progenitors (TAPs), characterized by elevated expression of  
75 the transcription factor *Ascl1* (Nakatani et al., 2013), followed by progressive  
76 differentiation into oligodendrocyte precursor cells (OPCs) and maturation into  
77 myelinating oligodendrocytes (Azim et al., 2016; El Waly et al., 2014). In rodents,  
78 approximately 5% of all cells derived from the adult SVZ are oligodendrocyte lineage  
79 cells (Capilla-Gonzalez, Cebrian-Silla, Guerrero-Cazares, Garcia-Verdugo, &  
80 Quinones-Hinojosa, 2013; El Waly et al., 2014; Menn et al., 2006).

81

82 Fate-mapping studies using Cre drivers under the control of regulatory regions from  
83 pallial and subpallial transcription factors demonstrated that molecularly distinct SVZ  
84 microdomains derive from their embryonic counterparts (reviewed in (Azim et al.,  
85 2016)). The embryonic septum, the lateral ganglionic eminences, and cortex contain  
86 NSCs that populate the medial (i.e. septal), ventral (i.e. striatal; also called lateral)  
87 and dorsal (i.e. cortical) aspects of the adult SVZ, respectively (Azim et al., 2016;  
88 Fiorelli, Azim, Fischer, & Raineteau, 2015). Localized labeling of NSCs showed that

89 regionally segregated NSCs are robustly committed to generating distinct cell  
90 subtypes (Menn et al., 2006; Merkle et al., 2014; Merkle, Mirzadeh, & Alvarez-Buylla,  
91 2007), and that environmental signals impinge on intrinsic fate control mechanisms  
92 to modulate specific aspects of NSC and progeny behavior.

93

94 The OPC and oligodendrocyte transcriptional programs in both adult and postnatal  
95 contexts have been comprehensively dissected using single cell sequencing  
96 technologies (Marques et al., 2018; Marques et al., 2016; Zeisel et al., 2015). A  
97 recent study revealed regional differences in lineage output from the SVZ with its  
98 ventral microdomain exhibiting predominantly pro-neuronal-, and the medial wall  
99 exhibiting pro-oligodendroglial hallmarks (Mizrak et al., 2019), in line with previous  
100 observations using fate-mapping and transcriptomic profiling methods demonstrating  
101 that ventral SVZ-NSCs during postnatal development (Azim, Fischer, et al., 2014;  
102 Azim et al., 2015; Zweifel et al., 2018) and in the adult (Azim, Raineteau, & Butt,  
103 2012; Dulken, Leeman, Boutet, Hebestreit, & Brunet, 2017; Llorens-Bobadilla et al.,  
104 2015; Felipe Ortega et al., 2013) are biased towards olfactory bulb neurogenesis.  
105 The generation of oligodendrocytes from the SVZ dorsal wall during early postnatal  
106 development is, however, considered as the default source for oligodendrocyte  
107 generation (Azim et al., 2017; Azim, Fischer, et al., 2014; Azim, Rivera, Raineteau, &  
108 Butt, 2014; Kessarlis et al., 2006). Likewise, the adult dorsal SVZ serves as an  
109 additional microdomain for their generation (Azim et al., 2017; Azim et al., 2012;  
110 Crawford, Tripathi, Richardson, & Franklin, 2016; Felipe Ortega et al., 2013). In  
111 contrast to the number of high throughput sequencing studies defining the molecular  
112 events underlying neuronal generation from adult NSC subpopulations (Marcy &  
113 Raineteau, 2019), far less is known about the regulatory context of adult SVZ-

114 dependent oligodendrogenesis. This is partly due to technical limitations in isolating  
115 relevant microdomains, e.g. typical SVZ whole-mount preparations are devoid of  
116 dorsal SVZ tissue (Mirzadeh, Doetsch, Sawamoto, Wichterle, & Alvarez-Buylla,  
117 2010). To overcome such restrictions, a cruder approach was used by capturing both  
118 dorsal and lateral walls (Basak et al., 2018), which enabled us to sequence sufficient  
119 numbers of single cells and to examine lineage-specific cells in the adult SVZ. Here,  
120 we describe the molecular events that regulate oligodendrogenesis from the adult  
121 SVZ and unravel mechanisms by which transcription factor networks and signaling  
122 pathways interact to drive specification in the early oligodendrocyte lineage.

123 **Word count: 880**

124

## 125 **MATERIALS AND METHODS**

### 126 **Determining the lineage memberships of SVZ-derived single NSCs and TAPs**

127 The procedures for transgenic and FACs strategies used for capturing single cells,  
128 mapping, pre-processing and RACEID are applied as described previously (Basak et  
129 al., 2018). The following reporter mice were used: quiescent(q)NSCs, few active(a)  
130 and primed(p)NSCs were taken from Troy::*GFP* mice; TAPs and neuroblasts were  
131 harvested from Ki67::*RFP* mice, and qNSCs (including a few pNSCs and aNSCs)  
132 were extracted from Ki67::*creRT2*::*Tom2* mice. FACs analysis (Figure S1a) allowed  
133 identification/isolation of GLAST+/EGF- qNSCs, GLAST+/EGF+ aNSCs, GLAST-  
134 /EGF+ TAPs and O4+ oligodendrocytes. Parameters for cell clusters identification  
135 were adapted as done previously (Basak et al., 2018) to obtain SVZ-lineage specific  
136 clusters.

137

138 We predicted that the transcriptional hallmarks of oligodendrogenesis and  
139 neurogenesis from the postnatal SVZ microdomains are retained to a certain extent  
140 into adulthood. Bulk datasets of our previous study (Azim et al., 2015) were used for  
141 identifying transcriptional signatures of the entire oligodendrocyte lineage by  
142 comparing dorsal NSCs, dorsal TAPs and oligodendrocytes and for ventral SVZ-  
143 derived neurogenesis. Transcription factors used as markers for lineage  
144 identification in adult single cell were (i) highly expressed during early postnatal  
145 development and (ii) uniquely expressed in either oligodendrocyte or neuronal  
146 lineages. These included among other genes *Notch2*, *Epas1*, *Foxo1*, and *Esrrg2*. A  
147 first characterization was performed with RACEID to identify rarer cell populations in  
148 single cell sequencing (Grun et al., 2015), then PartekFlow®  
149 (<http://www.partek.com/partek-flow/>) was used to assign single cells to defined SVZ  
150 lineages, including the rarer ones from RACEID. Visual inspection of t-Distributed  
151 Stochastic Neighbor Embedding (tSNE) plots displaying transcript levels for selected  
152 lineage-specific markers was used to sub-cluster cells found in close proximity in the  
153 plots. Figure S1b contains examples of some of the markers used in this  
154 oligodendrocyte lineage detection step.

155

156 Transcription factor markers obtained from bulk datasets were used to identify single  
157 cells of the oligodendroglial lineage (Azim et al., 2015), aside from OPCs and mature  
158 oligodendrocytes within subpopulations of NSCs/TAPs (Figure S1b). The soundness  
159 of our lineage membership assessment was further evaluated by comparing the  
160 gene expression profile of the remaining cells, expected to belong to the larger  
161 neurogenic population, with bulk datasets of adult qNSC/aNSC/TAP/NB populations.  
162 Adult TAPs and neuroblasts we described in a recent study (Azim et al., 2018).

163 PartekFlow was used to generate heat PCA plots describing pallial and subpallial  
164 marker expression by cells in the early stages of the oligodendrocyte lineage  
165 (qNSCI, qNSCII and pNSC). Gene Specific Analysis algorithm from PartekFlow was  
166 used with default parameters for acquiring gene lists defining the distinct cell  
167 lineages. Lineage-specificities were considered statistically relevant if the  
168 corresponding  $p$ -values were below 0.05. An additional analysis for determining the  
169 expression signatures of common genes (shared between oligodendroglial and  
170 neuronal lineages) was performed by identifying cluster-enriched genes for the first 5  
171 stages of differentiation (qNSCI-to-TAP) without separation of lineage-specific  
172 clones. The above steps allowed the definition of a total of 13 clusters: qNSCI,  
173 qNSCII, pNSC, aNSC, TAP, neuroblasts for the neuronal lineage and OLqNSCI,  
174 OLqNSCII, OLpNSC, OLaNSC, OLTAP, OPC and mature oligodendrocytes for  
175 oligodendroglial lineage.

176

177 Differential expression analysis was performed using datasets mentioned above by  
178 applying methods as described in (Azim et al., 2018) in addition to the cluster  
179 enriched transcripts using the Seurat V3 package as described in the next  
180 paragraph. Genes were filtered to select for transcription factors or transcriptional  
181 cues identified with PartekFlow. Macro-groups accounting for distinct differentiation  
182 stages were characterized as follows: (i) early oligodendrocyte group and the  
183 neurogenic group were defined by their expression of transcription factors expressed  
184 in single cells of (OL)qNSCI, (OL)qNSCII and (OL)pNSC; (ii) mid group for either  
185 lineage included transcription factors expressed in aNSCs and TAPs. The same  
186 datasets were used to identify enriched transcription factors when specific  
187 differentiation stages were compared. Precisely, the following stages were examined



188 as follows: (1) dorsal NSCs vs dorsal TAPs, OPCs, immature oligodendrocytes and  
189 mature oligodendrocytes; (2) dorsal TAPs vs dorsal NSCs, OPCs, immature  
190 oligodendrocytes and mature oligodendrocytes; (3) vNSCs vs vTAPs, TAPs and  
191 neuroblasts; (4) vTAPs vs vNSCs, TAPs and neuroblasts; (5) qNSCs vs aNSCs,  
192 TAPs and neuroblasts; (6) aNSCs vs qNSCs, TAPs and neuroblasts. Statistical  
193 analysis was performed using ANOVA for determining the differentially expressed  
194 (DE) transcription factors. Comparison of adult transcription factor expression in  
195 postnatal NSCs was summarized by assigning each transcription factor to a  
196 category: “1” indicates upregulated and highly expressed transcription factor, “-1”  
197 downregulated transcription factors, while “0” represents the remaining ones.

198

### 199 **Clustering and visualization of single cell data using the Seurat R package**

200 The R package Seurat V3 was used to process single cell transcriptomic data and  
201 elucidate their heterogeneity (<https://satijalab.org/seurat/vignettes.html> (Butler,  
202 Hoffman, Smibert, Papalexi, & Satija, 2018)). Single cells were assigned a unique  
203 identifier, then the default pipeline for analysis was performed: data were log-  
204 normalized and cells containing mitochondrial genes with a  $p$ -value greater than 0.05  
205 were filtered out. The obtained matrix was scaled so that JackStraw function could  
206 be applied for comparing the  $p$ -values distribution for all principal components. Using  
207 the genes displaying higher variation among the 13 clusters identified with  
208 PartekFlow, the Seurat function FindVariableFeatures determined 7 oligodendroglial  
209 and 6 neuronal clusters that were employed for the downstream pseudotime  
210 analysis. Graphical representations were created using Seurat package. Differential  
211 gene expression analysis was performed with FindAllMarkers function applying  
212 Wilcoxon rank sum test to find transcriptional markers of the 13 clusters. Of note,

213 several statistical tests were implemented to ensure the reliability of the set of most  
214 relevant genes. Aside from DESeq2, differentially expressed genes across these  
215 methods were comparably similar (further detailed in  
216 [https://satijalab.org/seurat/v3.0/de\\_vignette.html](https://satijalab.org/seurat/v3.0/de_vignette.html)).

217

## 218 **FateID cellular trajectory construction**

219 The genes specific for the 13 clusters were processed for assessing lineage biases  
220 by using FateID package for R environment. The goal is to resolve early lineage  
221 priming via iterative random forest classification (Herman, Sagar, & Grun, 2018). The  
222 default settings of the package were applied. In order to determine the relationship  
223 between terminal differentiation states and naïve stem/progenitor states, mature  
224 oligodendrocytes were equated as the heterotypic outlier of the neurogenic lineage.  
225 The variable genes in the neurogenic clusters and mature oligodendrocytes were  
226 used as a subset expression data frame. The top 10 genes belonging to each cluster  
227 as determined by the above Seurat analysis were used as learning set for the  
228 classification method hence defining the v matrix, while neuroblast and mature  
229 oligodendrocyte clusters were indicated as target set. Using fateBias function, a few  
230 iterations were operated by comparing consecutive stages of differentiation by  
231 setting the training set as the previous stage and the test set as the following one.  
232 For example, the defined NSC/TAP pool of the oligodendroglial lineage (including  
233 neuroblasts) was used as training set and mature oligodendrocytes, OPCs and  
234 neuroblasts were classified as the test set. Differentiation trajectories were computed  
235 using the principal curve function “prc”. The dimensionality reduction coordinates of  
236 the analyses of the cells and differentiation trajectories (data contained in the “dr”

237 and “pr” lists) were exported and plotted using the ggplot2 R package for improved  
238 graphical representation.

239

## 240 **Cell cycle regression**

241 NSCs/TAPs/neuroblasts, quiescent or activated, were further investigated to  
242 determine their position within the cell cycle, using CellCycleScoring function of  
243 Seurat package. Full details are available at  
244 [https://satijalab.org/seurat/v3.0/cell\\_cycle\\_vignette.html](https://satijalab.org/seurat/v3.0/cell_cycle_vignette.html) (Butler et al., 2018). Seurat  
245 estimates the mean expression of the marker genes from 43 S-phase and 54 G2/M-  
246 phase thus generating a uniform rank for S- and G2/M-phase for each cell, which  
247 results in the assignment of each single cell to a particular phase. The score was  
248 gauged by deducting the mean expression of the 10 nearest neighbor-cells in  
249 dimensionality reduction space computed by Seurat. Cell cycle scorings of cell  
250 populations were plotted according to their pseudotime trajectory coordinates as  
251 previously calculated. The data are visualized as cell cycle marker signal distribution  
252 in ridge plots (Figure 3). The aNSCs and TAPs of both lineages were further  
253 classified according to the different phases of the cell cycle, therefore leading to the  
254 identification of 15 distinct clusters (while the initial aNSC and TAP clusters were  
255 replaced). Seurat was run generating cluster-enriched expression profiles and those  
256 of the mid stages were used for further GO analysis as described below.

257

## 258 **Gene ontology and pathway annotation of cell clusters**

259 Gene lists for the original 13 clusters and the additional 4 ones (Figure 3e) were  
260 used for overrepresentation analysis using Protein ANalysis THrough Evolutionary  
261 Relationships (PANTHER) analysis tools (<http://www.pantherdb.org>) (Mi, Poudel,

262 Muruganujan, Casagrande, & Thomas, 2016)). Comparing the overrepresented  
263 pathways of the oligodendroglial and neuronal clusters, PANTHER pathways  
264 function was used for pointing out the mechanisms that differ or are shared between  
265 stages within a lineage or between the same stage in oligodendroglial and neuronal  
266 lineages. In this analysis, a minimum of 4 pathways for each cluster was retained if  
267 the corresponding  $p$ -value was below 0.05. TAP clusters or the later stage  
268 OPCs/mature oligodendrocytes contained a greater number of highly expressed  
269 genes, and so the top 10 most significantly expressed genes found with Seurat were  
270 used. Identification of genes that are unique to the oligodendrocyte lineage, the  
271 neuronal lineage and the shared ones was performed using the R Package Venn  
272 Diagram and the online tool <http://www.biovenn.nl/index.php>. Pathway and Protein  
273 Class lists obtained from PANTHER were downloaded for the analyses described  
274 above and presented as dot plots using the ggplot2 R package. Similarly, the time  
275 courses for GO SLIM Biological Processes were constructed for the oligodendrocyte  
276 lineage using the 5 most significant terms. Pathway time course was represented  
277 applying the same method and using selected key pathways from the prior analysis.  
278  
279 Due to the potential reversibility of early (i.e. NSC) cell state transitions (Basak et al.,  
280 2018; Calzolari et al., 2015; Obernier et al., 2018), a considerable overlap among  
281 cell clusters in terms of expression profiles, Reactome and PANTHER Pathways,  
282 and Protein Class led to the definition of 3 broader groups. For this, the earlier  
283 stages constituting OLqNSCI, OLqNSCII and OLpNSC, the mid stages represented  
284 by OLaNSC and OLTAP, and the remaining OPCs and mature oligodendrocytes as  
285 the later stages were assembled. Results for signaling Pathways, Reactome and  
286 Protein Classes enrichment corresponding to the 3 groups were merged and the top

287 third most significant terms for each of the 3 groups were charted as dot plots and  
288 ranked in descending order based on their enrichment. Results for transcription  
289 factor Protein Class for the 7 oligodendrocyte lineage clusters were visualized with a  
290 heatmap representing the top 3 most enriched PANTHER Pathways related to  
291 “transcription factor function” across the 7 clusters. The heatmap was obtained with  
292 the pheatmap package in R.

293

### 294 **Characterizing transcription factors for gene regulatory network (GRN)** 295 **reconstruction**

296 Once the most significant set of genes is determined, it is of importance to  
297 investigate if and how the genes are interacting at the molecular level. In addition to  
298 the genes previously identified as transcription factors, additional transcription  
299 factors known to play a central role in NSC differentiation were selected and their  
300 putative targets taken from [http://genome.gsc.riken.jp/TFdb/tf\\_list.html](http://genome.gsc.riken.jp/TFdb/tf_list.html),  
301 <http://www.tfcheckpoint.org/index.php/browse>, and PANTHER. Given the large  
302 numbers of transcription factors identified, a prioritization procedure was developed,  
303 relying on functional and transcription factor-transcription factor interaction data.  
304 Initially, the Cytoscape app GeneMANIA was used to identify functional interactions  
305 among the input genes (Franz et al., 2018). The data available for GeneMANIA for  
306 human gene orthologs are significantly more numerous and better characterized,  
307 therefore, mouse gene symbols were converted to human gene symbols. The genes  
308 used as input for GeneMANIA were limited to transcription factors and the queries  
309 were performed using the default parameter besides the type of interactions. In fact,  
310 the selected databases were “genetic” for downstream gene regulation and  
311 “physical” for protein-protein interactions. A first network (precursor to the one

312 depicted in Figure S7) was thus obtained, on which additional analyses were  
313 performed for prioritizing the large numbers of transcription factors included. For this,  
314 the heat diffusion algorithm was applied (Carlin, Demchak, Pratt, Sage, & Ideker,  
315 2017) to facilitate identification of central transcription factors according to their level  
316 of interactions: the higher the number of interactions, the higher the calculated heat  
317 diffusion rank. The heat diffusion algorithm was applied 3 times separately, once  
318 focusing on genetic interactions, (Figure S7b), once on physical interactions (Figure  
319 S7c), and finally combining the newly obtained heat diffusion ranks (Figure S7a).  
320 The diffusion ranking values so obtained were plotted against the number of  
321 interactions of each transcription factor. As additional information, the nodes size of  
322 the included transcription factors was adjusted to their combined physical and  
323 genetic interaction ranks in Figure S7d.

324

325 Aiming to group the transcription factors to organize the network similarly to the  
326 clustering of FateID, the precursor network was organized to depict transcription  
327 factor expression according to their stage of expression. The primary goal is focusing  
328 on oligodendrogenesis, hence transcription factors whose annotation showed an  
329 enrichment towards neuronal lineage only were discarded. Genes common to both  
330 lineages at different stages were processed in order to define transcription factors  
331 that show specificity to either lineage. The specificity threshold was defined at linear  
332 2-fold. This selection enabled emphasizing genes/transcription factors that are  
333 expressed in the oligodendrocyte lineage still including those ones sharing neuronal  
334 signatures. To assign transcription factors to the appropriate oligodendrocyte or  
335 neuronal clusters, the principle of higher expression was adapted. Nodes and labels  
336 sizes were organized based on the FDR values. A separate grouping of transcription

337 factors was made by selecting the transcription factors overlapping between aNSCs  
338 and TAPs. Transcription factors that were significantly expressed in at least 2  
339 different stages of the oligodendrocyte lineage were classified as "Pan transcription  
340 factors". GeneMania networks presented in Figure S7a were used as visual aids for  
341 facilitating the positioning of transcription factors according to the stages in  
342 differentiation they are expressed in.

343

### 344 **TETRAMER reconstruction of GRNs of SVZ lineages**

345 The above step focuses on transcription factor functions in terms of their genetic  
346 transcription factor-transcription factor interactions. This information was used as the  
347 framework for a comprehensive inspection of transcription factor-target gene  
348 interactions. For unravelling GRNs, TETRAMER (TEmporal TRAnscription regulation  
349 Modeller) reconstructs fate transition-specific GRNs by integrating transcriptome  
350 data (user provided) with inbuilt information (Cholley et al., 2018) (available gene  
351 expression profiles, human genome-wide promoters and enhancers maps, and  
352 ChIP-Seq available datasets) (see also <http://ngs-qc.org/tetramer/>). The input data for  
353 TETRAMER was constituted of a matrix containing 1467 genes – including  
354 transcription factors – irregularly expressed in the oligodendrocyte lineage during  
355 differentiation and, at the same time, expressed more in the neuronal lineage. Part of  
356 the genes were included in the input matrix due to their association with GO  
357 Biological Processes identified as major hallmarks of later stages of oligodendroglial  
358 maturation. These hallmark GO Biological processes were: (i) Signal Transduction,  
359 (ii) Ca Ion Transport, (iii) Synaptic Organization, (iv) CNS Development, and (v)  
360 Multicellular Organismal Development. All of them presented a  $p$ -value  $< 0.0002$  (as  
361 estimated with Hypergeometric test). Specific hallmarks for mature oligodendrocytes

362 in the considered GO Biological Process were: (i) Cytoskeleton Organization, (ii)  
363 Myelination, (iii) Myelin Maintenance, (iv) Cell Adhesion, and (v) Transport. All of  
364 them presented a  $p$ -value  $< 0.007$  (as estimated with Hypergeometric test). Genes  
365 consistently enriched more than 2.5 folds (aside from transcription factors) in OPCs  
366 and mature oligodendrocytes in the lists above and among DEGs found with  
367 Seurat were considered for a further functional enrichment analysis using the freely  
368 available Functional Enrichment analysis tool (FunRich) <http://funrich.org/index.html>.  
369 GO Biological terms were reduced to fit, and a complete list has otherwise been  
370 made publicly available (see below).

371

372 The following settings were necessary prior to assessing the transcriptional signaling  
373 propagation in the GRNs with TETRAMER. The matrix consisting of 1467 genes,  
374 among which are transcription factors expressed in both lineages (common  
375 transcription factors) or exclusively in either lineage, was used to construct 3  
376 separate subnetworks (presented in Figure 4b-d). These networks were filtered  
377 accordingly to highlight transcription factors expressed in the neuronal lineage and  
378 excluding genes expressed in OPCs and mature oligodendrocytes. The nodes  
379 expressed in the qNSCI stages were named “start node” as they represent the initial  
380 time point of differentiation, and transcription factors expressed in more than 2  
381 stages were termed “pan transcription factors”. The nodes expressed in final stages  
382 of differentiation, i.e. OPCs and mature oligodendrocytes for the oligodendrocyte  
383 lineage, were named “end node”. The time course for differentiation was arranged in  
384 order from qNSCI to mature oligodendrocytes, and all intermediate differentiation  
385 stages were selected for network propagation. In the TETRAMER results section, all  
386 transcription factors containing a yield were considered to be part of the main



387 signaling network. When the signal propagation network viewing was initiated, nodes  
388 in the network were colored from white/light red for the qNSCI nodes to darker red  
389 for mature oligodendrocytes, white to dark grey for transcription factors expressed in  
390 both lineage as "common transcription factors", and white to dark blue for  
391 transcription factors expressed in the neuronal lineage. Node sizes in these networks  
392 and subsequent analysis were graded based on the heat diffusion rank combined  
393 with additional parameters: node stress (calculated as the number of shortest paths  
394 passing through the considered node) indicating the extent of node activity,  
395 neighborhood connectivity, and the numbers of transcription factor-target gene  
396 interactions (edges). The values for each of these criteria were normalized in the  
397 range (0, 10) (low to high attribute values) and an average of all parameters was  
398 computed generating a final score termed as the connectivity index.

399

#### 400 **Reconstruction of the AdultOLgenesis GRN**

401 The GRNs representing transcription factors expressed in the oligodendrocyte  
402 lineage and the ones common to both SVZ lineages were examined further by  
403 combining data of these two networks. The input matrix used for TETRAMER was  
404 expanded with genes that account for the GO Biological Processes for later stages  
405 of oligodendrogenesis. The TETRAMER analysis was performed as described  
406 above. The newly obtained larger network was expanded further to include the  
407 interactions with transcription factors known to play a central role in NSC  
408 differentiation. Additional ChIP-seq data for *Ascl1*, *Cebpa*, *Hdac2*, *Jun*, *Sox4*, *Sox9*,  
409 *Tgif2*, and *Trp53* were obtained from the Chip Atlas database (Oki et al., 2018), while  
410 *Hopx* (He et al., 2016; Jain et al., 2015), *Zeb1* (Rosmaninho et al., 2018) were taken  
411 from individual studies. For *Trp53* and *Zeb1* original data, the potential targets were

412 annotated using human species gene names, hence to merge the results of the  
413 different datasets coherently, an R script was compiled for converting human-  
414 annotated to mouse-annotated genes (biomaRt package) (Durinck, Spellman,  
415 Birney, & Huber, 2009). For the potential gene targets extracted from the Chip Atlas  
416 database, a threshold on the score returned by the database was defined to select  
417 the targets with highest level of confidence (threshold values: 250). For *Hopx*, a  
418 different thresholding approach was applied, for the available data were processed  
419 differently: ChIP-seq data were processed with the Homer suit of tools, and therefore  
420 a different score was assigned to each identified peak. To discriminate between the  
421 relatively reliable targets, the average score was calculated and set as the  
422 discriminant threshold. For all the added transcription factors, a node was added to  
423 the precursor GRN representing the transcription factor itself. Interactions  
424 representing the ChIP-Seq data were created between the transcription factor and  
425 the targets already included in the precursor GRN. In order to select the target genes  
426 and generate this representation, a Python script was compiled. The code generated  
427 a text file associating to each transcription factor-target pair the source of the datum,  
428 the type of the interaction, and the type of the source data. To extend the number of  
429 interactions of the GRN specifically or oligodendrogenesis, the transcription factor-  
430 target gene networks were imported independently in Cytoscape and union-merged  
431 with the Exploration network recently published by Cantone and colleagues  
432 (Cantone et al., 2019). The union merge was repeated between the latest union  
433 merge and the AdultOLgenesis Network generated by TETRAMER, thus  
434 incorporating additional information. For the 11 selected transcription factors, targets  
435 were selected based on (i) a score describing the confidence of the actual formation  
436 of the transcription factor-target gene binding, thus increasing the reliability of the

437 interaction, and (ii) the biological context of the transcription factor-target gene  
438 binding by limiting the set of genes to the ones previously identified in the Core GRN.  
439 The confidence in the identification of the same transcription factor-target gene  
440 binding in human and mouse species is ensured by a high level of genomic  
441 similarity.

442

443 The obtained network was remodeled for positioning the nodes according to their  
444 pseudotime trajectory coordinates, thus providing an improved overview for  
445 transcriptional processes. The GeneMania network presented in Figure S7a was  
446 used as reference to guide the correct placement of genes in individual stages of  
447 differentiation. The Cytoscape plugin CoordinatesLayout version 3.0 and  
448 copycatLayout version 0.0.9 were used. The average coordinates for defined cells at  
449 each stage of differentiation was calculated along its x-y axis, and at each of the  
450 estimated positions, a node was added to represent the corresponding differentiation  
451 stage. The size of the node was scaled to reflect the relative abundance of  
452 transcription factors associated to the differentiation stage. The “mock” nodes  
453 representing oligodendrocyte cell clusters were organized according to their FateID  
454 trajectories. Nodes representing transcription factors/genes associated with each of  
455 the different stages of the oligodendrocyte lineage were grouped together and force  
456 directed using Compound Spring Embedder (CoSE), and overlaid with the mock  
457 nodes. Settings for CoSE were adjusted systematically for all oligodendrocyte stages  
458 with edge lengths kept constant and spring strength/repulsion adjusted equally.  
459 Nodes with higher heat diffusion ranks were permitted to overlay those genes with  
460 lower heat diffusion ranks to highlight transcription factors with greater functional  
461 relevance. Interactions were bundled using handles with the following parameters:

462 0.003 spring constant, compatibility threshold of 0.3 and 500 maximum iterations.  
463 Nodes without interactions (that is, without edges) were excluded and hidden in the  
464 background. Summaries highlighting downstream transcriptional regulation  
465 (outwards transcriptional propagation) were constructed by adjusting node and edge  
466 sizes reflecting the relative numbers of transcription factors/genes in the different  
467 stages of differentiation and the downstream activation or repressive transcriptional  
468 control, respectively. Five additional GO Biological Processes were manually  
469 included close to later-stage oligodendrocytes. The entire reconstructed network was  
470 termed “AdultOLgenesis GRN” and was thus an expansion of a recent study  
471 describing GRNs during OPC-to-mature oligodendrocyte differentiation (Cantone et  
472 al., 2019) by inclusion of additional regulatory features.

473

#### 474 **Assessing transcriptional propagation by selected transcription factors and** 475 **Signaling Pathways**

476 Transcription factors expressed in defined stages of oligodendrogenesis (see also  
477 Figure S7) or associated in PANTHER pathways were tested for transcriptional  
478 propagation across the Core GRN (see also Section 7 of the online repository:  
479 <https://github.com/kasumaz/AdultOLgenesis>). The transcription factors were selected  
480 with their direct target genes and subsequent secondary and tertiary target genes.  
481 All primary target genes were retained, whereas secondary and tertiary target genes,  
482 if they were transcription factors, were filtered according to their protein-protein  
483 interaction and connectivity index of  $>7.5$  and  $>7$ , respectively. Biological Process  
484 GO terms were preserved throughout. Interactions of transcription factors associated  
485 with PANTHER pathways, secondary and tertiary target genes were sized in order of  
486 line thickness in this order. Manual curation was operated for correcting the edges

487 between GO Biological Processes and PANTHER pathways. Transcription factors in  
488 each network were ranked in heatmaps for each pathway, according to the number  
489 of target gene interactions (activation/inhibition) across the different pathways  
490 selected for analysis. Gene regulatory data for the quantification of activation,  
491 inhibition and unspecified interaction were obtained from the edge section of the  
492 AdultOLgenesis GRN in Cytoscape.

493 **Word count: 3860**

494

## 495 RESULTS

### 496 Identification of the earliest stages of the SVZ-derived oligodendrocyte lineage

497 Transcriptional networks controlling oligodendrogenesis from adult SVZ-NSCs are  
498 currently unsolved. Here, NSCs/progenitors and subtypes of neural cells found within  
499 the young adult SVZ were isolated and FACS-enriched using genetic reporters and  
500 immunochemical markers, as described in a previous report on adult neurogenesis  
501 (Basak et al., 2018) (Figure S1a). Relying on well-established markers for the earlier  
502 stages in oligodendrogenesis as a guide, we identified putative lineage-specific  
503 subpopulations of NSCs (Figure S1b). Approximately 1200 single cells were  
504 visualized using tSNE plots and used for categorizing previously defined clusters and  
505 subclusters (Basak et al., 2018). We hypothesized that, as in the early postnatal  
506 SVZ, adult lineage-specific NSCs could be identified by their expression of  
507 oligodendroglial and neuronal hallmark genes. To this end, previously generated lists  
508 of genes associated with SVZ-oligodendrogenesis from bulk datasets were  
509 assembled and searched for oligodendrocyte lineage-enriched genes when  
510 compared to neurogenic populations (Azim et al., 2017). In this initial step,  
511 PartekFlow was used to input a number of landmark genes that define the earlier  
512 stages of the oligodendrocyte lineage. These include the essential transcription  
513 factors *Olig2*, *Olig1* and *Sox10*, and a cohort of other transcription factors as  
514 described in Materials and methods (Figure S1b). As an advantage, PartekFlow  
515 highlights cells based on input gene marker profiles, allowing the identification of  
516 neighboring cells that are transcriptionally similar. Following classification of putative  
517 oligodendrocyte lineage cells descending from NSCs/TAPs, gene lists derived from  
518 PartekFlow had initially revealed that the major differences in the 2 SVZ lineages are  
519 attributed to the expression of transcription factors (see below), in agreement with

520 the observed pre-eminence of transcription factors as lineage-specific markers within  
521 postnatal gliogenic lineages (Azim et al., 2015). Thus, expression levels of  
522 transcription factors were explored. In particular, single NSCs/TAPs expressing the  
523 above 3 essential transcription factors, as well as a cohort of others (Figure S1b)  
524 expressed in postnatal gliogenic NSCs were identified as likely to contribute to the  
525 oligodendrocyte lineage (Figure 1a) and amounted to approximately 7.2% of all  
526 NSC/TAPs across the 5 NSC and TAP stages of differentiation, which is in line with  
527 previous reports describing the relative scale of SVZ-oligodendrogenesis when  
528 compared to the generation of neurons (Menn et al., 2006). This particular  
529 subpopulation is identified by the co-expression of the known pan-NSC marker *Hes5*  
530 in qNSCs I/II expressing *Olig2* (Figure 1b). The first 3 stages of identified OLNSCs  
531 also expressed the pallial marker *Pax6* whereas they did not express the ventral  
532 SVZ markers *Gsx2* and *Nkx2-1* (Figure 1b). Most notably, an initial analysis of  
533 differentially expressed genes (DEGs) revealed patterns that are reminiscent of  
534 transcriptional programs found during postnatal oligodendrogenesis (Figure S1b).  
535 Identified cells of the oligodendrocyte lineage in the adult cluster closely with  
536 corresponding pooled populations (qNSC1-pNSC) in transcription factor expression,  
537 including postnatal gliogenic NSCs/TAPs (Figure S1c), reinforcing the view that  
538 subsets of adult NSCs are committed to an oligodendrogenic fate.

539

540 Next, FateID pseudotime analysis was performed to assess whether identified  
541 putative oligodendrogenic and neurogenic NSCs define distinct cell state trajectories  
542 (Herman et al., 2018). The genes that are significantly varying as determined by the  
543 Seurat analysis (see Materials and methods) in oligodendrogenic and neurogenic  
544 lineages, and the genes enriched in mature oligodendrocytes, were used for testing

545 the hypothesis that the selected oligodendrocyte lineage cells engage in a trajectory  
546 from earlier subpopulations of NSCs/TAPs. Oligodendrocytes and neuroblasts were  
547 used as the final lineage endpoints. Neuroblasts followed a continuous trajectory  
548 from qNSCI and many neurogenic TAPs resembled neuroblasts in pseudotime  
549 (Figure 1c). Addition of mature oligodendrocytes to this mostly neurogenic trajectory  
550 forces an early branching for the oligodendrocyte lineage, at qNSCI/II stages.  
551 However, when considering mature oligodendrocytes alongside putatively  
552 oligodendrogenic NSCs/TAPs and OPCs, mature oligodendrocytes branched off the  
553 main trajectory closer to OLaNSCs, TAPs and OPCs. Interestingly, addition of  
554 neuroblasts to the oligodendroglial trajectory resulted in a transcriptional path that  
555 overlapped partly with fewer OLTAPs compared to the neurogenic TAPs, highlighting  
556 the distinction between the two lineages. Genes detected in early- to mid-stage  
557 oligodendrocyte lineage cells (qNSCI to TAPs; Figure 1d-f) regulate signaling-to-  
558 transcriptional control of the oligodendrocyte lineage. Cluster-enriched markers  
559 (Figure 1f) include genes coding for the G-protein-coupled receptor genes *Lrig1* and  
560 *Adora2b* for OLqNSCI (Poth, Brodsky, Ehrentraut, Grenz, & Eltzhig, 2013; Simion,  
561 Cedano-Prieto, & Sweeney, 2014); the Bmp4-responsive gene *Htra1* serine protease  
562 (Chen et al., 2018), and the gliogenic transcriptional adaptor *Hopx* for OLqNSCII  
563 (Zweifel et al., 2018); the transcriptional regulator *Foxo1* (Kim, Hwang, Muller, &  
564 Paik, 2015), or the mitochondrial ketogenic enzyme *Hmgcs2* in OLpNSCs (Jebb &  
565 Hiller, 2018). OLaNSC and OLTAP markers include genes encoding for *Hspa1a* and  
566 *Hspa1b*, and *Cdk4* and *Hes6*, respectively (Arion, Unger, Lewis, Levitt, & Mirnics,  
567 2007; Kim et al., 2015; Lukaszewicz & Anderson, 2011). This analysis revealed that  
568 many of the cluster-specific genes belong to families involved in signaling and  
569 transcriptional control, and demonstrated that cells representing the earliest stages



570 of the oligodendrocyte lineage are identifiable among NSCs, allowing the analysis of  
571 lineage-specific signatures. Further examples of pan lineage markers are given in  
572 Figure S2.

573

### 574 **Stage-specific processes**

575 Following determination of stage-/cluster-specific signatures, we focused on  
576 individual lineages (oligodendrocyte and neuronal, separately) and analyzed the cell  
577 clusters in each (7 oligodendroglial clusters, 6 neuronal clusters) for pathway  
578 enrichment using the PANTHER database. The most significant pathways for each  
579 stage of the 2 lineages are illustrated in dot plots showing the activity of a given  
580 pathway across the different clusters (Figure 2a). In this analysis, the genes  
581 exclusively belonging to 1 cluster were examined. Interestingly, the earliest stages of  
582 the oligodendrocyte lineage (qNSCI-pNSC) were uniquely characterized by the  
583 activity of pathways (e.g., “angiogenesis”, “cysteine biosynthesis”, “cytoskeletal  
584 regulation by RhoGTPases” and “pyruvate metabolism”), which also distinguished  
585 them from early NSC stages of the neuronal lineage. Contrastingly, a considerable  
586 overlap in pathways in the mid-stages (aNSC and TAPs) between the 2 lineages  
587 was evident, with few exceptions such as “Notch signaling” that was prominently  
588 enriched in OLaNSCs, and “p53 and cell cycle pathways” enriched in the same  
589 stages of the neuronal lineage.

590

591 All genes enriched in the oligodendrocyte lineage clusters (including those shared  
592 with the neuronal lineage) were next examined for characteristic biological processes  
593 (Slim Biological Processes in PANTHER) and plotted across the various stages of  
594 lineage progression. Machineries related to “lipid or energy metabolism”, “response

595 to signaling” or “developmental patterning molecules” were enriched in the earlier  
596 stages, whereas mechanisms such as “translation”, “gene expression” and “cell  
597 division” were most prominent in OLaNSCs and OLTAPs (Figure 2b), consistent with  
598 previous observations (Llorens-Bobadilla et al., 2015). At a later stage of  
599 differentiation, OPCs engage in processes that were also active in OLqNSCII. For  
600 example, GO biological process “cell communication” is enriched in OLqNSCII, and  
601 then again at the OPC stage (Figure 2b), possibly accounting for the close proximity  
602 of these 2 segregated populations in both the tSNE plots and pseudotime (Figure  
603 1a,c). Many of the characteristic processes detected in mature oligodendrocytes  
604 increase in expression during the course of lineage progression. We expanded this  
605 analysis for both protein class and signaling pathways, to include the neuronal  
606 lineage (Figure S3), observing that transcription factors and nucleic acid-binding  
607 proteins are highly abundant in the early and mid-stages of the oligodendrocyte  
608 lineage along with major developmental pathways. A time course for the expression  
609 of the most significant signaling pathways in this analysis points to key processes  
610 regulating transition along the oligodendrocyte lineage (Figure S4), with increasing  
611 transcriptional activity suggested by the pattern of expression of transcription factors  
612 and nucleic acid-binding proteins across the different oligodendrocyte lineage stages  
613 (Figure S5). Altogether, these findings outline potential mechanistic differences in the  
614 control of progression within the 2 SVZ-derived lineages, with notable differences in  
615 inferred signaling pathway activities and in the expression of transcriptional  
616 modulators.

617

## 618 **Cell cycle properties of SVZ-NSCs/progenitors**

619 Given the observed differences in cell cycle, transcriptional control and nucleic acid  
620 synthesis pathways in mid-stages (OLaNSC, OLTAP) of the oligodendrocyte lineage  
621 we further explored stage-specificity. To this end, cell clusters were analyzed by  
622 computing cell cycle phase scores based on canonical markers for the 3 main cycle  
623 phases (S, G2M and G1 phase) using the Seurat V3 package. Single cells'  
624 expression levels of established cell cycle markers were compared and data were  
625 regressed out by modeling the relationship between expression signatures of each  
626 cell with cell cycle markers. Upon identification of the predicted cell cycle state for  
627 cells of all 13 clusters, those representing the oligodendrocyte lineage were plotted  
628 in accordance to their pseudotemporal coordinates and summarized in bar plots for  
629 both lineages (Figure 3a,b), and signal intensities as ridge plots (Figure 3c). In both  
630 lineages, the early stage NSCs (qNSCI-pNSC) and OPCs were almost entirely at the  
631 G1 phase with signal intensities shifted towards baseline, whereas S and G2M  
632 marker signals were detected in neuroblasts (Figure 3c). More than half of the  
633 aNSCs in either lineage were actively cycling and rarely at the G2M phase, whilst the  
634 remaining were quiescent. Although no proneuronal TAP was found to be quiescent,  
635 with just over 55% at the G2M phase and the remaining in S phase, a slightly greater  
636 proportion of OLTAPs were in S phase. Signal intensities for the S and G2M markers  
637 were relatively absent in the early neuronal lineage.

638

639 Following identification of the mid-stage cell cycle properties, Seurat V3 was used to  
640 identify cluster-specific genes in OLaNSCs and OLTAP by subclassification  
641 according to their predicted cell cycle phase. Therein, transcripts significantly  
642 expressed by the 9 cell clusters (OLqNSCI, OLqNSCII, OLpNSC, OLaNSC in G1,  
643 OLaNSC in S Phase, OLTAP in G2M, OLTAP in S Phase, OPC and mature

644 oligodendrocytes) were extracted and a further pathway analysis was performed on  
645 the mid-stages of the oligodendroglial lineage (OLaNSC in S Phase, OLTA in G2M  
646 and OLTA in S Phase). Pathways and Protein Class determination was performed  
647 for OLaNSCs in the G1 and S phase in the intercept (genes overlapping in the 2  
648 groups) in this analysis and the same for G2M and S phase for OLTA (Figure 3d,  
649 e). Interestingly, aside from Notch and Hedgehog signaling, metabolic-like  
650 mechanisms that include thiamine metabolism and threonine biosynthesis are also  
651 features of quiescent OLaNSCs, whereas cycling aNSCs were characterized by  
652 pathways regulating transcription, translation, and nucleic acid binding. In OLTA at  
653 the G2M phase, EGF-, p38 MAPK-, p53 and interferon gamma-signaling were  
654 significantly enriched. Furthermore, as expected, many of the pathways expressed in  
655 actively cycling TAPs included regulation of mRNA, replication, and cell cycle-related  
656 processes (Figure 3d). Cell cycle-related analysis of mid-stage oligodendrocytes  
657 accordingly revealed that the major protein classes expressed in G2M and S phases  
658 were “nucleic acid-binding” and “transcription factor”, whereas OLaNSCs in G1 were  
659 characterized by extracellular matrix and vesicle-associated SNARE proteins (Figure  
660 3e). Altogether, examining heterogeneity of cell cycle states in proliferative cells of  
661 the oligodendroglial lineage suggests that transcriptional cues are a major driver in  
662 OLqNSCII and in mid-stages of the lineage, which warrants further investigation.

663

### 664 **Gene regulatory networks in NSCs/TAPs driving myelination**

665 The previous analysis disclosed major classes of genes expressed in earlier  
666 oligodendroglial lineage cells, notably with mid-proliferative cell stages featuring  
667 abundant expression of transcriptional modulators. Therefore, the expression of  
668 transcription factors (including transcriptional adapters and transcription cofactors)

669 was further explored in both the oligodendroglial and neuronal lineages.  
670 Transcription factors were prioritized via a GeneMania-based genetic and physical  
671 interaction analysis. This step facilitates predicting the effects of genetically  
672 perturbing a given transcription factor, in terms of its impact on neighboring genes,  
673 based on predicted transcription factor-to-targetgene interactions and protein-protein  
674 interactions (see Materials and methods; Figure S6). To determine which  
675 transcription factors are most relevant according to their genetic perturbation, genes  
676 were prioritized by applying the “heat diffusion” algorithm that tests the input query  
677 data and the functional interaction of each gene for propagation across the network.  
678 Strongly connected nodes in the network, supporting sufficient regulatory activity  
679 propagation, are uncovered and allow creation of subnetworks, enabling exclusion of  
680 nodes with lower functional relevance. Prioritization steps were applied for both  
681 physical (protein-protein interactions) and genetic interaction (Figure S6a and  
682 expanded further in Figure S7) and identified transcription factors with potentially  
683 central roles in specifying cell states.

684

685 We next employed TETRAMER, a tool integrating inferred differentiation states  
686 during lineage progression with gene regulatory networks (GRNs) from publicly  
687 available datasets (Cholley et al., 2018), for the reconstruction of GRNs whose  
688 activity may define cell states within the oligodendroglial and neuronal lineages.  
689 Briefly, lists of transcription factors expressed in the identified clusters of the  
690 oligodendroglial and neuronal lineages as well as transcription factors that are  
691 expressed in both of these lineages (“common” transcription factors), were used as  
692 input by TETRAMER to explore gene expression profiles of mammalian tissues/cells  
693 with comprehensive analysis of deposited ChIP-sequencing data corresponding to

694 transcription factor-binding and further comprising data on actively transcribed  
695 enhancers and promoters. In the preliminary step, transcription factor-transcription  
696 factor and transcription factor-target gene interactions were compiled for determining  
697 regulatory interactions between shared neurogenesis- and oligodendrogenesis-  
698 restricted (Figure S6b-c) transcription factors. A large proportion (89.3-91.8% of all  
699 interactions) of transcription factor-target gene interactions for transcription factors  
700 common to both lineages and those regulating neurogenesis consisted in predicted  
701 target gene activation. Interestingly, however, activating and inhibiting regulatory  
702 interactions were predicted to occur at similar frequencies between  
703 oligodendrogenesis-specific transcription factors, highlighting qualitative differences  
704 in how cell state transitions are controlled at the transcriptional level in the 2  
705 lineages. Transcription factor interactions with target genes were quantified using the  
706 Cytoscape network analysis parameters by probing the entire training GRN  
707 reconstructed (as described in Figure 4) and presented as intensity heatmaps for the  
708 top 25 transcription factors with the most global, activating and inhibiting target gene  
709 interactions in Figure S6e (ranked transcription factor examples in Figure S6f).  
710 Amongst the most highly ranked transcription factors were *Cebpa*, expressed in  
711 OLqNSCII and best described in the context of myelopoiesis, where it inhibits  
712 proliferation (see (Calella et al., 2007) for proposed roles during neural  
713 development), and *Ezh2*, which promotes embryonic NSC proliferation and  
714 differentiation into OPCs (Sher et al., 2008). Altogether, these analyses enable  
715 ranking transcription factors that are likely to act as “master regulators” based on a  
716 number of parameters that include their target gene regulation, protein-protein  
717 interactions and diffusive effects downstream. To further investigate the major gene  
718 regulatory cascades controlling adult oligodendrogenesis, the GRN assembled for

719 common transcription factors and oligodendrogenesis (Figure S6b,d) were combined  
720 and merged with a recently assembled GRN for post-OPC stages of oligodendroglial  
721 maturation (Cantone et al., 2019) (Figure 5), which defined the role of transcription  
722 factors such as *Olig2*, *Sox10*, and *Tcf7l2* during oligodendrocyte differentiation and  
723 maturation. Here, genes overlapping in later-stage oligodendrocytes from the  
724 present study with those published recently (Cantone et al., 2019), were filtered and  
725 represented as GO Biological Processes in a larger merged network (Figure 5).  
726 Approximately, a quarter of the differentially expressed genes, as determined by the  
727 Seurat analysis, were used in this TETRAMER analysis. Of note, modulation of  
728 many of these genes has previously been reported during postnatal and adult  
729 oligodendrogenesis from NSCs (Azim et al., 2015). This final network termed as  
730 “AdultOLgenesis GRN” was used for further analysis as described below. The  
731 individual stages were then positioned relative to the average positioning of single  
732 cells/clusters in FateID pseudotime (Figure 1c) (see Materials and methods for  
733 network assembly).

734

### 735 **Stage-specific GRN**

736 Focusing on target gene activation or repression in substages of the oligodendrocyte  
737 lineage reveals varying and contrasting degrees of gene regulation (Figure 5a-f).  
738 Notably, the OLqNSCII, OLaNSC and OLTAP stages exhibited prominent gene  
739 regulatory activities, with OLaNSCs seemingly progressively activating TAP-specific  
740 target genes (Figure 5b,e,f), whilst also inhibiting the expression of genes typical for  
741 the most differentiated (OPC/mature oligodendrocyte) stages. This suggests that,  
742 following activation, oligodendrocyte lineage cells would steadily progress to the TAP  
743 stage, which could be temporarily stabilized by active repression of differentiation-



744 associated gene modules. Interestingly, the uniquely low expression levels of  
745 transcription factors active in OLqNSCI and OLpNSCs are predicted to only modestly  
746 result in GRN state restructuring at these stages. These findings demonstrate that  
747 transcription factors expressed in distinct stages during oligodendrogenesis have  
748 contrasting modes of gene regulation.

749

750 Next, the highest ranked transcription factors for each of the selected  
751 oligodendrocyte lineage stages were probed for the extent to which their inferred  
752 transcriptional regulatory activity propagates within the assembled GRN. The  
753 downstream gene regulatory effects of *Olig2* and *Sox10*, which modulate the  
754 expression of a large number of genes involved in gliogenic and neurogenic  
755 processes (Cantone et al., 2019), provided a quantitative reference to assess the  
756 GRN-modulating activity of newly identified transcription factors. The immediate  
757 downstream target genes for *Olig2* and *Sox10* are presented in a subnetwork (Figure  
758 5g), and downstream propagation cumulatively modulates 75% of all network  
759 components within one further tier. The regulatory activity of *Mitf* and *Rreb1*,  
760 expressed in OLqNSCI, spread the least within the GRN, supporting the previous  
761 analysis (Figure S6e) that shows *Rreb1* as the highest ranked transcriptional  
762 repressor (Figure 5h). The impact of OLqNSCII transcription factors *Cebpa* and  
763 *Epas1* quantitatively resembles that of *Olig2* and *Sox10* (Figure 6i). Interestingly,  
764 *Cebpa* has been described for myelopoiesis as inhibiting cell cycle-related genes  
765 (Calella et al., 2007), which fits with its predicted inhibitory interactions with major  
766 cell cycle genes expressed in TAPs, supporting its role as a quiescent NSC-specific  
767 transcription factor. The 2 highest-ranked OLpNSC transcription factors, *Foxo1* and  
768 *Nr1d1*, induce the expression of a number of cell cycle regulators expressed in



769 OLaNSCs and OLTAPs (Figure 5j). Like OLqNSCIIIs, OLaNSCs and OLTAPs  
770 express transcription factors whose predicted influence on oligodendrocyte GRN  
771 activity resembles that exerted by *Olig2* and *Sox10*. These findings identify putative  
772 core regulators of stage-specific oligodendrocyte GRNs, thus complementing known  
773 pan-oligodendrocyte transcription factors *Olig2* and *Sox10* and providing a view into  
774 stage-specific control of oligodendroglial lineage progression.

775

### 776 **PANTHER Pathway Integration of GRNs**

777 Having defined GRN state transitions controlling oligodendrocyte lineage  
778 progression, we attempted integrating this knowledge with stage-specific signaling  
779 pathway activity predictions from our previous PANTHER analysis (Figure 2b),  
780 reasoning that the identified signaling pathways would impact cell fate by ultimately  
781 modulating transcriptional networks. We explored this hypothesis using the  
782 reconstructed AdultOLgenesis GRN, examining signaling pathways known to  
783 modulate at least 2 transcription factors expressed at a given stage, and then  
784 assessing the predicted propagation of their transcriptional modulatory activity within  
785 the GRN. The direct target genes and additional secondary target genes regulated  
786 by both *Olig2* and *Sox10*, as performed in the prior analysis in Figure 5g, were used  
787 as a gauge for transcriptional coverage of each tested transcription factor associated  
788 with PANTHER pathway terms. In addition, the transcription factors induced by  
789 selected PANTHER signaling pathways were ranked based on the number of  
790 transcription factor-target gene interactions. These were further classified according  
791 to their gene-activating, -inhibitory, and unspecified effects onto the oligodendrocyte  
792 lineage in red, green, and grey, respectively (Figure 6a). In the earlier stages of the  
793 oligodendrocyte lineage, Wnt signaling is predicted to affect approximately half as

794 many GRN components as those modulated by *Olig2* and *Sox10*. Our previous  
795 reports demonstrated that manipulating the Wnt signaling pathway by pharmacologic  
796 or genetic strategies increases the expression of *Ascl1*, *Olig2* and *Sox10* transcripts  
797 by at least 2.5-fold (Azim, Fischer, et al., 2014; Azim, Rivera, et al., 2014). In the  
798 present study, these essential transcription factors were indeed predicted to be  
799 secondary target genes of the Wnt pathway (Figure 6a,b), thus potentially  
800 accounting for the previously described enhancements of myelination following Wnt  
801 signaling modulation (Azim et al., 2017; Azim, Fischer, et al., 2014; Azim, Rivera, et  
802 al., 2014) and validating this strategy. PDGF signaling on the other hand induces  
803 similar gene regulatory events as *Olig2* and *Sox10*, although initially repressing  
804 genes expressed in later stage oligodendrocytes (Figure 6c), in line with its role as  
805 an OPC mitogen. However, *Stat1* and *Stat5b*, transcription factors modulated by the  
806 PDGF pathway, activate transcriptional networks in TAPs that enhance the  
807 expression of genes in OPCs and mature oligodendrocytes, leading to extensive  
808 downstream transcription factor induction that included a number of master  
809 regulators (see heatmap in Figure 6c). Interestingly, the pathways active in  
810 OLaNSCs (“Transcriptional regulation by bZIP transcription factors”, “Gonadotropin  
811 signaling pathway”) and in OLTAPs (“General Transcriptional Regulation”) are  
812 involved in a number of gene regulatory events larger even than those elicited by  
813 *Olig2* and *Sox10*, suggesting extensive GRN reorganization at these stages,  
814 possibly reflecting a lineage watershed on the way to differentiation. Indeed, a  
815 number of the above identified master regulators (Figure S6e) are key effectors of  
816 PANTHER pathway terms enriched in OLaNSCs and OLTAPs. Other potent  
817 signaling pathways examined include Notch signaling and p53 active in OLaNSCs  
818 (G1 and S phase) and TAPs (G2/M and S phase). Other pathways identified in the

819 earlier PANTHER analysis, including “Angiogenesis” (OLqNSCI), “Circadian clock”  
820 (OLqNSCII/qNSCII) and “p53 Feedback Loops 2” (G2M and S phase  
821 OLaNSC/OLTAP), had overall fewer predicted transcriptional effects. Altogether,  
822 these findings demonstrate that large cohorts of transcription factors in the  
823 reconstructed Core GRN are effectors of multiple signaling pathways and provide  
824 useful insights into how environmental cues could affect transcriptional activities, and  
825 thus lineage progression, during SVZ-derived oligodendrogenesis. Future studies will  
826 aim at expanding these observations by testing the functionality of identified  
827 signaling pathways and to confirm changes in target expression experimentally.

828 **Word count: 3500**

829

## 830 **DISCUSSION**

831 In the present study, a meta-analysis of single cell RNAseq data from the adult SVZ  
832 was performed to resolve the transcriptional signatures that distinguish between  
833 adult neurogenesis and oligodendrogenesis. Recent transcriptomic analyses  
834 focusing on early postnatal development and adulthood (Azim et al., 2017; Azim et  
835 al., 2015; Mizrak et al., 2019), provided some insights into the gene expression  
836 profiles associated with oligodendrogenesis. A number of newer transcriptomics  
837 studies of adult neurogenesis have shed light onto the molecular processes  
838 regulating the generation of olfactory bulb neurons (reviewed in (Marcy & Raineteau,  
839 2019)). In addition, landmark studies using single cell profiling of murine  
840 oligodendrocytes from different stages of life in the CNS have immensely contributed  
841 to our understanding of the heterogeneity and molecular regulation of  
842 oligodendrocyte differentiation (Marques et al., 2018; Marques et al., 2016; Zeisel et  
843 al., 2015). A recent elegant single-cell sequencing survey of the lateral and medial  
844 walls of the young adult SVZ demonstrated that NSCs located in microdomains other  
845 than the lateral wall generate oligodendrocytes (Mizrak et al., 2019), but an in-depth  
846 investigation into the mechanisms controlling adult oligodendrogenesis had not yet  
847 been performed. To this end, we analyzed recently generated single-cell data from  
848 the SVZ (Basak et al., 2018) focusing on NSC/progenitor heterogeneity, in order to  
849 identify putative oligodendrocyte- and neuron-restricted progenitors (Felipe Ortega et  
850 al., 2013). Our findings reveal transcriptional regulators as major protein classes  
851 modulating all stages of the SVZ-NSC-derived oligodendrocyte lineage.

852

853 We carefully inspected the transcriptomes of NSCs and TAPs for the expression of  
854 known early oligodendroglial lineage marker genes (Figure S1). These included  
855 members of the Sox transcription factor family and *Olig2/Olig1*, which were found to  
856 be expressed selectively in NSC/TAPs that also expressed other known gliogenic  
857 markers such as *Hopx*, *Notch* genes and their subsequent target genes of the *Hes*  
858 family, overall resembling the pattern of expression observed during postnatal  
859 oligodendrogenesis (Azim et al., 2015). Oligodendrocyte lineage NSCs/TAPs  
860 amounted to approximately 7% of all NSCs and TAPs, which is in line with earlier  
861 retroviral-fate mapping observations describing a similar oligodendrocyte/neuron  
862 output ratio between from the adult SVZ (Menn et al., 2006). Comparison of single  
863 cells at a defined stage of the two lineages showed only a modest degree of  
864 separation in tSNE plots. While this implies close similarity between the early steps  
865 of oligodendroglial and neuronal lineage progression, key differences were  
866 associated with specific classes of genes, such as transcription factors. Notably,  
867 more closely focusing on lineage-specific features by GO “Protein Class” and  
868 “Pathway” analyses revealed that from the earliest quiescent NSC stages to TAPs,  
869 the terms related to “transcriptional cues” accounted for most of the differences  
870 between the two lineages. In agreement with the findings of the present study, these  
871 broad classes of genes have recently been described as enriched in oligodendroglial  
872 clusters of adult NSCs/TAPs (Mizrak et al., 2019), similar to observations made  
873 during postnatal development in pre-OPC (TAPs) populations (Marques et al., 2018),  
874 and elsewhere during embryonic oligodendrogenesis (Klum et al., 2018). Our  
875 comprehensive side-by-side comparison of protein classes differentially expressed  
876 by the two SVZ lineages unequivocally demonstrates transcriptional control as a  
877 major determinant of fate specification and lineage progression and warranted

878 further in-depth characterization of the GRN controlling oligodendrogenesis (see  
879 below). Pathway analysis of the most immature stages (qNSCI to TAP) in the two  
880 lineages suggested previously unappreciated mechanisms controlling the generation  
881 of adult oligodendrocytes from the SVZ. Important pathways detected in the qNSCI/II  
882 and pNSC stages of the oligodendrocyte lineage included Wnt signaling,  
883 angiogenesis and Notch signaling, all known as important pathways regulating adult  
884 oligodendrogenesis (reviewed in (El Waly et al., 2014)). Other key pathway terms  
885 derived from this analysis include “Circadian clock”, which has not previously been  
886 described as a regulator of oligodendrogenesis, although an earlier study proposed  
887 this pathway as a cell-intrinsic timer for inhibiting cell division in postnatal OPCs  
888 (Gao, Durand, & Raff, 1997). Interestingly, PDGF signaling was uniquely enriched in  
889 OLpNSCs in our analysis and we predict that this oligodendrocyte lineage stage  
890 comprises the SVZ cell population previously reported to undergo *in vivo* expansion  
891 upon exposure to infused PDGF-A (Jackson et al., 2006; Moore, Bain, Loh, &  
892 Levison, 2014). Pathways detected in aNSC and TAP populations comprise “Cell  
893 cycle”, “DNA/nucleotide synthesis” and “Transcriptional machineries”, consistent with  
894 single cell profiling studies of adult neurogenesis (Dulken et al., 2019; Llorens-  
895 Bobadilla et al., 2015). We also identified Notch signaling as a regulator of  
896 oligodendrocyte-fated aNSCs and TAPs, which is in agreement with previous  
897 observations in the context of early SVZ-derived gliomagenesis (Giachino et al.,  
898 2015) and during OPC generation from embryonic NPCs (Cui et al., 2004).

899

900 Interestingly, scoring the early oligodendroglial and neuronal lineage cells for their  
901 proliferative state revealed instead broad similarities between corresponding cell  
902 stages, suggesting that lineage commitment and proliferative expansion are at least

903 in part independently controlled. These similarities were fewer at post-TAP stages,  
904 where OPCs and the very earliest neuroblasts (before emigration via the rostral  
905 migratory stream) comprised mostly of quiescent cells and proliferative states,  
906 respectively. The latter stage, upon pharmacogenomically instructed manipulation for  
907 directing specific cell fates in older adult mice, results in its expansion and  
908 subsequent dorsal-SVZ-derived OPCs (Azim et al., 2017). In support of these  
909 findings, “Nucleic acid binding” and “transcription factor” pathways were most  
910 prominent during S phase compared to G1 and G2M phases, suggesting  
911 transcriptional modulation associated with access to *de novo* synthesized DNA (e.g.  
912 propagation or passive loss of modifications on newly added histones) (Figure 3e).  
913 Thus, targeting transcription factor programs regulating cell cycle phases in adult  
914 OLTAPs as previously described (Azim et al., 2017), presents additional avenues in  
915 promoting the generating of adult-born OPCs.

916

917 Establishment of a pan-oligodendrocyte GRN allowed us to investigate  
918 transcriptional network organization during lineage progression, defining stage-  
919 specific GRN states and their core regulators, which add to well-established broad-  
920 oligodendrocyte transcription factors such as *Olig2* and *Sox10*. These transcription  
921 factors are well-characterized as binding to the promoters of a large number of  
922 genes regulating several aspects of NSC/progenitor behaviors. *Olig2*, aside from  
923 regulating transcriptional programs associated with lineage progression and  
924 myelination in the post-OPC stages, also represses proneuronal and quiescence  
925 genes and activates genes that promote cell cycle entry and oligodendrogenesis in  
926 NSCs/NPs (Mateo et al., 2015). A number of *Sox10* target genes overlap with those  
927 of *Olig2* in later stage oligodendrocytes (Cantone et al., 2019), while comparatively

928 little is known about oligodendrocyte transcription factor genome occupancy patterns  
929 in SVZ-NSCs. In our analysis, *Sox10* mRNA was detected already in OLaNSCs,  
930 consistent with its expression downstream of *Olig2* (Liu et al., 2007) and we predict  
931 *Sox10* to be downregulating genes expressed in the neuronal lineage, including *Sufu*  
932 that represses signaling pathways (e.g. Wnt and Shh signaling) which limit the  
933 specification of OPCs (Pozniak et al., 2010).

934

935 Surprisingly, transcriptional control of lineage progression was most marked during  
936 the actively proliferating oligodendrocyte lineage stages (OLaNSC and OLTAP) and  
937 at the OLqNSCII stage, which we explored for predictive functions of transcription  
938 factors. In our reconstructed GRN, analyzing transcription factor-target gene  
939 interactions in the oligodendrocyte lineage aside from the well-characterized  
940 transcriptional regulators, we uncovered novel master regulators. We used our  
941 reconstructed GRN for predicting gene regulatory functions of these putative master  
942 regulators. Amongst those identified were *Cebpa*, which has been described to  
943 regulate genes expressed in the cycling population of the oligodendrocyte lineage  
944 (Calella et al., 2007), and *Mitf*, which activates the transcription of the *Dct* gene (Jiao  
945 et al., 2006), previously identified as highly expressed in gliogenic SVZ-NSCs (Azim  
946 et al., 2015). Transcription factors expressed by OLaNSCs tended to positively  
947 regulate TAP-specific genes, thus possibly promoting rapid lineage progression,  
948 while the set of TAP-expressed transcription factors suggests concomitant  
949 reinforcement of the TAP-specific gene-expression program and repression of  
950 differentiation-associated genes (Figure 6e,f). Indeed, target gene repression  
951 emerged as more widespread than in the neuronal lineage and may reflect the need



952 for stabilization of an intermediate undifferentiated stage after initial lineage  
953 progression and expansion downstream of NSCs (Menn et al., 2006).

954

955 Our work identified transcription factors/transcriptional networks in the earlier stages  
956 of the oligodendrocyte lineage that had been poorly characterized, and future  
957 mechanistic studies will aim to confirm their predicted gene regulatory control of  
958 oligodendrogenesis. Finally, given the predicted relevance of environmental  
959 signaling and transcriptional control over oligodendrocyte lineage progression, we  
960 investigated the ability of extracellular signaling events to modulate core  
961 transcriptional regulators of the oligodendrocyte GRN. Several well-established  
962 signaling pathways were predicted to stage-specifically impinge on core GRN  
963 components, suggesting a measure of environmental control over lineage  
964 progression. Thus, while SVZ-derived oligodendrocyte lineages are capable of  
965 remarkable intrinsic control over their maturation (F. Ortega et al., 2013), a series of  
966 known and novel environmental factors can confer flexibility to this process by  
967 regulating the expression of transcriptional modulators of oligodendrocyte lineage  
968 progression.

969 **Word count: 1446**

970

971 **CONFLICTS OF INTEREST**

972 The authors have no competing or financial interests to declare.

973

974 **AUTHORS' CONTRIBUTIONS**

975 KA was responsible for the conceptualization, data curation, formal analysis, funding  
976 acquisition, investigation, methodology, project administration, supervision. FC  
977 contributed to writing, validation and data analysis. MC carried out data curation,  
978 analysis, investigation validation, and methodology. RA contributed to writing, data  
979 curation, formal analysis, investigation, methodology. JV was responsible for funding  
980 acquisition, project administration, supervision; HPH: funding acquisition, supervision  
981 and project administration. OB was involved in data curation, acquisition and  
982 methodology. AB was responsible for writing, methodology, supervision and  
983 validation. HPH was responsible for funding acquisition and project administration.  
984 PK for funding acquisition, investigation, methodology, project administration,  
985 supervision, validation and writing.

986

987 **OPEN RESEARCH**

988 Scripts developed for the first time, Cytoscape files, cluster specific gene lists, gene  
989 matrices and any other raw data of this study are placed in the repository Github  
990 <https://github.com/kasumaz/AdultOLgenesis>. Assistance for TETRAMER usage can  
991 also be requested from Dr Marco A. Mendoza ([mmendoza@genoscope.cns.fr](mailto:mmendoza@genoscope.cns.fr)). A  
992 user friendly web interface that allows investigators to examine gene expression  
993 across all single cells assembled will be made online upon acceptance with the

994 expertise of the lab of Julio Vera (see for example:

995 <https://www.curatopes.com/melanoma/>).

996

## 997 REFERENCES

- 998 Arion, D., Unger, T., Lewis, D. A., Levitt, P., & Mirnics, K. (2007). Molecular evidence  
999 for increased expression of genes related to immune and chaperone function  
1000 in the prefrontal cortex in schizophrenia. *Biol Psychiatry*, *62*(7), 711-721. doi:  
1001 10.1016/j.biopsych.2006.12.021
- 1002 Azim, K., Akkermann, R., Cantone, M., Vera, J., Jadasz, J. J., & Kury, P. (2018).  
1003 Transcriptional Profiling of Ligand Expression in Cell Specific Populations of  
1004 the Adult Mouse Forebrain That Regulates Neurogenesis. *Front Neurosci*, *12*,  
1005 220. doi: 10.3389/fnins.2018.00220
- 1006 Azim, K., Angonin, D., Marcy, G., Pieropan, F., Rivera, A., Donega, V., . . .  
1007 Raineteau, O. (2017). Pharmacogenomic identification of small molecules for  
1008 lineage specific manipulation of subventricular zone germinal activity. *PLoS*  
1009 *Biol*, *15*(3), e2000698. doi: 10.1371/journal.pbio.2000698
- 1010 Azim, K., Berninger, B., & Raineteau, O. (2016). Mosaic Subventricular Origins of  
1011 Forebrain Oligodendrogenesis. *Front Neurosci*, *10*, 107. doi:  
1012 10.3389/fnins.2016.00107
- 1013 Azim, K., Fischer, B., Hurtado-Chong, A., Draganova, K., Cantu, C., Zemke, M., . . .  
1014 Raineteau, O. (2014). Persistent Wnt/beta-catenin signaling determines  
1015 dorsalization of the postnatal subventricular zone and neural stem cell  
1016 specification into oligodendrocytes and glutamatergic neurons. *Stem Cells*,  
1017 *32*(5), 1301-1312. doi: 10.1002/stem.1639
- 1018 Azim, K., Hurtado-Chong, A., Fischer, B., Kumar, N., Zweifel, S., Taylor, V., &  
1019 Raineteau, O. (2015). Transcriptional Hallmarks of Heterogeneous Neural  
1020 Stem Cell Niches of the Subventricular Zone. *Stem Cells*, *33*(7), 2232-2242.  
1021 doi: 10.1002/stem.2017
- 1022 Azim, K., Raineteau, O., & Butt, A. M. (2012). Intraventricular injection of FGF-2  
1023 promotes generation of oligodendrocyte-lineage cells in the postnatal and  
1024 adult forebrain. *GLIA*, *60*(12), 1977-1990. doi: 10.1002/glia.22413
- 1025 Azim, K., Rivera, A., Raineteau, O., & Butt, A. M. (2014). GSK3beta regulates  
1026 oligodendrogenesis in the dorsal microdomain of the subventricular zone via  
1027 Wnt-beta-catenin signaling. *GLIA*, *62*(5), 778-779. doi: 10.1002/glia.22641
- 1028 Basak, O., Krieger, T. G., Muraro, M. J., Wiebrands, K., Stange, D. E., Frias-  
1029 Aldeguer, J., . . . Clevers, H. (2018). Troy+ brain stem cells cycle through  
1030 quiescence and regulate their number by sensing niche occupancy. *Proc Natl*  
1031 *Acad Sci U S A*, *115*(4), E610-E619. doi: 10.1073/pnas.1715911114
- 1032 Butler, A., Hoffman, P., Smibert, P., Papalex, E., & Satija, R. (2018). Integrating  
1033 single-cell transcriptomic data across different conditions, technologies, and  
1034 species. *Nat Biotechnol*, *36*(5), 411-420. doi: 10.1038/nbt.4096
- 1035 Calella, A. M., Nerlov, C., Lopez, R. G., Sciarretta, C., von Bohlen und Halbach, O.,  
1036 Bereshchenko, O., & Minichiello, L. (2007). Neurotrophin/Trk receptor  
1037 signaling mediates C/EBPalpha, -beta and NeuroD recruitment to immediate-  
1038 early gene promoters in neuronal cells and requires C/EBPs to induce  
1039 immediate-early gene transcription. *Neural Dev*, *2*, 4. doi: 10.1186/1749-8104-  
1040 2-4
- 1041 Calzolari, F., Michel, J., Baumgart, E. V., Theis, F., Gotz, M., & Ninkovic, J. (2015).  
1042 Fast clonal expansion and limited neural stem cell self-renewal in the adult  
1043 subependymal zone. *Nat Neurosci*, *18*(4), 490-492. doi: 10.1038/nn.3963

- 1044 Cantone, M., Kuspert, M., Reiprich, S., Lai, X., Eberhardt, M., Gottle, P., . . . Vera, J.  
1045 (2019). A gene regulatory architecture that controls region-independent  
1046 dynamics of oligodendrocyte differentiation. *GLIA*. doi: 10.1002/glia.23569
- 1047 Capilla-Gonzalez, V., Cebrian-Silla, A., Guerrero-Cazares, H., Garcia-Verdugo, J.  
1048 M., & Quinones-Hinojosa, A. (2013). The generation of oligodendroglial cells  
1049 is preserved in the rostral migratory stream during aging. *Front Cell Neurosci*,  
1050 7, 147. doi: 10.3389/fncel.2013.00147
- 1051 Carlin, D. E., Demchak, B., Pratt, D., Sage, E., & Ideker, T. (2017). Network  
1052 propagation in the cytoscape cyberinfrastructure. *PLoS Comput Biol*, 13(10),  
1053 e1005598. doi: 10.1371/journal.pcbi.1005598
- 1054 Chen, J., Van Gulden, S., McGuire, T. L., Fleming, A. C., Oka, C., Kessler, J. A., &  
1055 Peng, C. Y. (2018). BMP-Responsive Protease HtrA1 Is Differentially  
1056 Expressed in Astrocytes and Regulates Astrocytic Development and Injury  
1057 Response. *J Neurosci*, 38(15), 3840-3857. doi: 10.1523/JNEUROSCI.2031-  
1058 17.2018
- 1059 Cholley, P. E., Moehlin, J., Rohmer, A., Zilliox, V., Nicaise, S., Gronemeyer, H., &  
1060 Mendoza-Parra, M. A. (2018). Modeling gene-regulatory networks to describe  
1061 cell fate transitions and predict master regulators. *NPJ Syst Biol Appl*, 4, 29.  
1062 doi: 10.1038/s41540-018-0066-z
- 1063 Crawford, A. H., Tripathi, R. B., Richardson, W. D., & Franklin, R. J. (2016).  
1064 Developmental Origin of Oligodendrocyte Lineage Cells Determines  
1065 Response to Demyelination and Susceptibility to Age-Associated Functional  
1066 Decline. *Cell Rep*. doi: 10.1016/j.celrep.2016.03.069
- 1067 Cui, X. Y., Hu, Q. D., Tekaya, M., Shimoda, Y., Ang, B. T., Nie, D. Y., . . . Xiao, Z. C.  
1068 (2004). NB-3/Notch1 pathway via Deltex1 promotes neural progenitor cell  
1069 differentiation into oligodendrocytes. *J Biol Chem*, 279(24), 25858-25865. doi:  
1070 10.1074/jbc.M313505200
- 1071 Dulken, B. W., Buckley, M. T., Navarro Negredo, P., Saligrama, N., Cayrol, R.,  
1072 Leeman, D. S., . . . Brunet, A. (2019). Single-cell analysis reveals T cell  
1073 infiltration in old neurogenic niches. *Nature*, 571(7764), 205-210. doi:  
1074 10.1038/s41586-019-1362-5
- 1075 Dulken, B. W., Leeman, D. S., Boutet, S. C., Hebestreit, K., & Brunet, A. (2017).  
1076 Single-Cell Transcriptomic Analysis Defines Heterogeneity and  
1077 Transcriptional Dynamics in the Adult Neural Stem Cell Lineage. *Cell Rep*,  
1078 18(3), 777-790. doi: 10.1016/j.celrep.2016.12.060
- 1079 Durinck, S., Spellman, P. T., Birney, E., & Huber, W. (2009). Mapping identifiers for  
1080 the integration of genomic datasets with the R/Bioconductor package  
1081 biomaRt. *Nat Protoc*, 4(8), 1184-1191. doi: 10.1038/nprot.2009.97
- 1082 El Waly, B., Macchi, M., Cayre, M., & Durbec, P. (2014). Oligodendrogenesis in the  
1083 normal and pathological central nervous system. *Front Neurosci*, 8, 145. doi:  
1084 10.3389/fnins.2014.00145
- 1085 Figueres-Onate, M., Sanchez-Villalon, M., Sanchez-Gonzalez, R., & Lopez-  
1086 Mascaraque, L. (2019). Lineage Tracing and Cell Potential of Postnatal Single  
1087 Progenitor Cells In Vivo. *Stem Cell Reports*, 13(4), 700-712. doi:  
1088 10.1016/j.stemcr.2019.08.010
- 1089 Fiorelli, R., Azim, K., Fischer, B., & Raineteau, O. (2015). Adding a spatial dimension  
1090 to postnatal ventricular-subventricular zone neurogenesis. *Development*,  
1091 142(12), 2109-2120. doi: 10.1242/dev.119966

- 1092 Franz, M., Rodriguez, H., Lopes, C., Zuberi, K., Montojo, J., Bader, G. D., & Morris,  
1093 Q. (2018). GeneMANIA update 2018. *Nucleic Acids Res*, 46(W1), W60-W64.  
1094 doi: 10.1093/nar/gky311
- 1095 Fuentealba, L. C., Rompani, S. B., Parraguez, J. I., Obernier, K., Romero, R.,  
1096 Cepko, C. L., & Alvarez-Buylla, A. (2015). Embryonic Origin of Postnatal  
1097 Neural Stem Cells. *Cell*, 161(7), 1644-1655. doi: 10.1016/j.cell.2015.05.041
- 1098 Gao, F. B., Durand, B., & Raff, M. (1997). Oligodendrocyte precursor cells count time  
1099 but not cell divisions before differentiation. *Curr Biol*, 7(2), 152-155. doi:  
1100 10.1016/s0960-9822(06)00060-1
- 1101 Giachino, C., Boulay, J. L., Ivanek, R., Alvarado, A., Tostado, C., Lugert, S., . . .  
1102 Taylor, V. (2015). A Tumor Suppressor Function for Notch Signaling in  
1103 Forebrain Tumor Subtypes. *Cancer Cell*, 28(6), 730-742. doi:  
1104 10.1016/j.ccell.2015.10.008
- 1105 Grun, D., Lyubimova, A., Kester, L., Wiebrands, K., Basak, O., Sasaki, N., . . . van  
1106 Oudenaarden, A. (2015). Single-cell messenger RNA sequencing reveals rare  
1107 intestinal cell types. *Nature*, 525(7568), 251-255. doi: 10.1038/nature14966
- 1108 He, D., Marie, C., Zhao, C., Kim, B., Wang, J., Deng, Y., . . . Lu, Q. R. (2016). Chd7  
1109 cooperates with Sox10 and regulates the onset of CNS myelination and  
1110 remyelination. *Nat Neurosci*, 19(5), 678-689. doi: 10.1038/nn.4258
- 1111 Herman, J. S., Sagar, & Grun, D. (2018). FateID infers cell fate bias in multipotent  
1112 progenitors from single-cell RNA-seq data. *Nat Methods*, 15(5), 379-386. doi:  
1113 10.1038/nmeth.4662
- 1114 Jackson, E. L., Garcia-Verdugo, J. M., Gil-Perotin, S., Roy, M., Quinones-Hinojosa,  
1115 A., VandenBerg, S., & Alvarez-Buylla, A. (2006). PDGFR alpha-positive B  
1116 cells are neural stem cells in the adult SVZ that form glioma-like growths in  
1117 response to increased PDGF signaling. *Neuron*, 51(2), 187-199. doi:  
1118 10.1016/j.neuron.2006.06.012
- 1119 Jain, R., Li, D., Gupta, M., Manderfield, L. J., Ifkovits, J. L., Wang, Q., . . . Epstein, J.  
1120 A. (2015). HEART DEVELOPMENT. Integration of Bmp and Wnt signaling by  
1121 Hopx specifies commitment of cardiomyoblasts. *Science*, 348(6242),  
1122 aaa6071. doi: 10.1126/science.aaa6071
- 1123 Jebb, D., & Hiller, M. (2018). Recurrent loss of HMGCS2 shows that ketogenesis is  
1124 not essential for the evolution of large mammalian brains. *Elife*, 7. doi:  
1125 10.7554/eLife.38906
- 1126 Jiao, Z., Zhang, Z. G., Hornyak, T. J., Hozeska, A., Zhang, R. L., Wang, Y., . . .  
1127 Chopp, M. (2006). Dopachrome tautomerase (Dct) regulates neural progenitor  
1128 cell proliferation. *Dev Biol*, 296(2), 396-408. doi: 10.1016/j.ydbio.2006.06.006
- 1129 Kessar, N., Fogarty, M., Iannarelli, P., Grist, M., Wegner, M., & Richardson, W. D.  
1130 (2006). Competing waves of oligodendrocytes in the forebrain and postnatal  
1131 elimination of an embryonic lineage. *Nat Neurosci*, 9(2), 173-179. doi:  
1132 10.1038/nn1620
- 1133 Kim, D. Y., Hwang, I., Muller, F. L., & Paik, J. H. (2015). Functional regulation of  
1134 FoxO1 in neural stem cell differentiation. *Cell Death Differ*, 22(12), 2034-2045.  
1135 doi: 10.1038/cdd.2015.123
- 1136 Klum, S., Zaouter, C., Alekseenko, Z., Bjorklund, A. K., Hagey, D. W., Ericson, J., . . .  
1137 Bergsland, M. (2018). Sequentially acting SOX proteins orchestrate  
1138 astrocyte- and oligodendrocyte-specific gene expression. *EMBO Rep*, 19(11).  
1139 doi: 10.15252/embr.201846635
- 1140 Liu, Z., Hu, X., Cai, J., Liu, B., Peng, X., Wegner, M., & Qiu, M. (2007). Induction of  
1141 oligodendrocyte differentiation by Olig2 and Sox10: evidence for reciprocal



- 1142 interactions and dosage-dependent mechanisms. *Dev Biol*, 302(2), 683-693.  
1143 doi: 10.1016/j.ydbio.2006.10.007
- 1144 Llorens-Bobadilla, E., Zhao, S., Baser, A., Saiz-Castro, G., Zwadlo, K., & Martin-  
1145 Villalba, A. (2015). Single-Cell Transcriptomics Reveals a Population of  
1146 Dormant Neural Stem Cells that Become Activated upon Brain Injury. *Cell*  
1147 *Stem Cell*, 17(3), 329-340. doi: 10.1016/j.stem.2015.07.002
- 1148 Lukaszewicz, A. I., & Anderson, D. J. (2011). Cyclin D1 promotes neurogenesis in  
1149 the developing spinal cord in a cell cycle-independent manner. *Proc Natl Acad*  
1150 *Sci U S A*, 108(28), 11632-11637. doi: 10.1073/pnas.1106230108
- 1151 Marcy, G., & Raineteau, O. (2019). Concise Review: Contributions of single cell  
1152 approaches for probing heterogeneity and dynamics of neural progenitors  
1153 throughout life. *Stem Cells*. doi: 10.1002/stem.3071
- 1154 Marques, S., van Bruggen, D., Vanichkina, D. P., Floriddia, E. M., Munguba, H.,  
1155 Varemo, L., . . . Castelo-Branco, G. (2018). Transcriptional Convergence of  
1156 Oligodendrocyte Lineage Progenitors during Development. *Dev Cell*, 46(4),  
1157 504-517 e507. doi: 10.1016/j.devcel.2018.07.005
- 1158 Marques, S., Zeisel, A., Codeluppi, S., van Bruggen, D., Mendanha Falcao, A., Xiao,  
1159 L., . . . Castelo-Branco, G. (2016). Oligodendrocyte heterogeneity in the  
1160 mouse juvenile and adult central nervous system. *Science*, 352(6291), 1326-  
1161 1329. doi: 10.1126/science.aaf6463
- 1162 Mateo, J. L., van den Berg, D. L., Haeussler, M., Drechsel, D., Gaber, Z. B., Castro,  
1163 D. S., . . . Martynoga, B. (2015). Characterization of the neural stem cell gene  
1164 regulatory network identifies OLIG2 as a multifunctional regulator of self-  
1165 renewal. *Genome Res*, 25(1), 41-56. doi: 10.1101/gr.173435.114
- 1166 Menn, B., Garcia-Verdugo, J. M., Yaschine, C., Gonzalez-Perez, O., Rowitch, D., &  
1167 Alvarez-Buylla, A. (2006). Origin of oligodendrocytes in the subventricular  
1168 zone of the adult brain. *The Journal of neuroscience : the official journal of the*  
1169 *Society for Neuroscience*, 26(30), 7907-7918.
- 1170 Merkle, F. T., Fuentealba, L. C., Sanders, T. A., Magno, L., Kessar, N., & Alvarez-  
1171 Buylla, A. (2014). Adult neural stem cells in distinct microdomains generate  
1172 previously unknown interneuron types. *Nat Neurosci*, 17(2), 207-214. doi:  
1173 10.1038/nn.3610
- 1174 Merkle, F. T., Mirzadeh, Z., & Alvarez-Buylla, A. (2007). Mosaic organization of  
1175 neural stem cells in the adult brain. *Science*, 317(5836), 381-384.
- 1176 Mi, H., Poudel, S., Muruganujan, A., Casagrande, J. T., & Thomas, P. D. (2016).  
1177 PANTHER version 10: expanded protein families and functions, and analysis  
1178 tools. *Nucleic Acids Res*, 44(D1), D336-342. doi: 10.1093/nar/gkv1194
- 1179 Mirzadeh, Z., Doetsch, F., Sawamoto, K., Wichterle, H., & Alvarez-Buylla, A. (2010).  
1180 The subventricular zone en-face: wholemount staining and ependymal flow. *J*  
1181 *Vis Exp*(39). doi: 10.3791/1938
- 1182 Mizrak, D., Levitin, H. M., Delgado, A. C., Crotet, V., Yuan, J., Chaker, Z., . . .  
1183 Doetsch, F. (2019). Single-Cell Analysis of Regional Differences in Adult V-  
1184 SVZ Neural Stem Cell Lineages. *Cell Rep*, 26(2), 394-406 e395. doi:  
1185 10.1016/j.celrep.2018.12.044
- 1186 Moore, L., Bain, J. M., Loh, J. M., & Levison, S. W. (2014). PDGF-responsive  
1187 progenitors persist in the subventricular zone across the lifespan. *ASN Neuro*,  
1188 6(2). doi: 10.1042/AN20120041
- 1189 Nakatani, H., Martin, E., Hassani, H., Clavairoly, A., Maire, C. L., Viadieu, A., . . .  
1190 Parras, C. (2013). Ascl1/Mash1 promotes brain oligodendrogenesis during

- 1191 myelination and remyelination. *J Neurosci*, 33(23), 9752-9768. doi:  
1192 10.1523/JNEUROSCI.0805-13.2013
- 1193 Obernier, K., Cebrian-Silla, A., Thomson, M., Parraguez, J. I., Anderson, R., Guinto,  
1194 C., . . . Alvarez-Buylla, A. (2018). Adult Neurogenesis Is Sustained by  
1195 Symmetric Self-Renewal and Differentiation. *Cell Stem Cell*, 22(2), 221-234  
1196 e228. doi: 10.1016/j.stem.2018.01.003
- 1197 Oki, S., Ohta, T., Shioi, G., Hatanaka, H., Ogasawara, O., Okuda, Y., . . . Meno, C.  
1198 (2018). ChIP-Atlas: a data-mining suite powered by full integration of public  
1199 ChIP-seq data. *EMBO Rep*, 19(12). doi: 10.15252/embr.201846255
- 1200 Ortega, F., Gascon, S., Masserdotti, G., Deshpande, A., Simon, C., Fischer, J., . . .  
1201 Berninger, B. (2013). Oligodendroglial and neurogenic adult  
1202 subependymal zone neural stem cells constitute distinct lineages and exhibit  
1203 differential responsiveness to Wnt signalling. *Nat Cell Biol*, 15(6), 602-613.  
1204 doi: 10.1038/ncb2736
- 1205 Ortega, F., Gascón, S., Masserdotti, G., Deshpande, A., Simon, C., Fischer, J., . . .  
1206 Berninger, B. (2013). Oligodendroglial and neurogenic adult  
1207 subependymal zone neural stem cells constitute distinct lineages and exhibit  
1208 differential responsiveness to Wnt signalling. *Nat Cell Biol*, 15(6), 602-613.  
1209 doi: 10.1038/ncb2736
- 1210 Poth, J. M., Brodsky, K., Ehrentraut, H., Grenz, A., & Eltzhig, H. K. (2013).  
1211 Transcriptional control of adenosine signaling by hypoxia-inducible  
1212 transcription factors during ischemic or inflammatory disease. *J Mol Med*  
1213 (*Berl*), 91(2), 183-193. doi: 10.1007/s00109-012-0988-7
- 1214 Pozniak, C. D., Langseth, A. J., Dijkgraaf, G. J., Choe, Y., Werb, Z., & Pleasure, S.  
1215 J. (2010). Sox10 directs neural stem cells toward the oligodendrocyte lineage  
1216 by decreasing Suppressor of Fused expression. *Proc Natl Acad Sci U S A*,  
1217 107(50), 21795-21800. doi: 10.1073/pnas.1016485107
- 1218 Rosmaninho, P., Mukusch, S., Piscopo, V., Teixeira, V., Raposo, A. A., Warta, R., . . .  
1219 . Castro, D. S. (2018). Zeb1 potentiates genome-wide gene transcription with  
1220 Lef1 to promote glioblastoma cell invasion. *Embo J*, 37(15). doi:  
1221 10.15252/emboj.201797115
- 1222 Sher, F., Rossler, R., Brouwer, N., Balasubramanian, V., Boddeke, E., & Copray, S.  
1223 (2008). Differentiation of neural stem cells into oligodendrocytes: involvement  
1224 of the polycomb group protein Ezh2. *Stem Cells*, 26(11), 2875-2883. doi:  
1225 10.1634/stemcells.2008-0121
- 1226 Simion, C., Cedano-Prieto, M. E., & Sweeney, C. (2014). The LRIG family: enigmatic  
1227 regulators of growth factor receptor signaling. *Endocr Relat Cancer*, 21(6),  
1228 R431-443. doi: 10.1530/ERC-14-0179
- 1229 Zeisel, A., Munoz-Manchado, A. B., Codeluppi, S., Lonnerberg, P., La Manno, G.,  
1230 Jureus, A., . . . Linnarsson, S. (2015). Brain structure. Cell types in the mouse  
1231 cortex and hippocampus revealed by single-cell RNA-seq. *Science*,  
1232 347(6226), 1138-1142. doi: 10.1126/science.aaa1934
- 1233 Zweifel, S., Marcy, G., Lo Guidice, Q., Li, D., Heinrich, C., Azim, K., & Raineteau, O.  
1234 (2018). HOPX Defines Heterogeneity of Postnatal Subventricular Zone Neural  
1235 Stem Cells. *Stem Cell Reports*, 11(3), 770-783. doi:  
1236 10.1016/j.stemcr.2018.08.006
- 1237



1238 **References Word Count: 2244**

1239

## 1240 **FIGURE LEGENDS**

### 1241 **Figure 1**

1242 Identification of lineage-specific NSCs/NPs. (a) tSNE plot of 1200 single cells  
1243 (including microglia, choroid plexus, neurons and vascular cells; see Figure S1)  
1244 expressing the transcription factors *Olig1*, *Olig2* and *Sox10*. PCA color plot of  
1245 transcript expression for determining cells with elevated expression of core  
1246 oligodendrocyte lineage markers. (b) Selected early oligodendrocyte lineage cell  
1247 expression of pallial marker *Pax6* and subpallial markers *Nkx2.1* and *Gsx2* together  
1248 with the NSC marker *Hes5* for determining a potential dorsal origin of  
1249 oligodendrocyte lineage. (c) FateID pseudotime demonstrates that the mature  
1250 oligodendrocyte (MOL) transcriptional trajectory branches off only at the very earliest  
1251 stages in the neuronal lineage, whereas among identified oligodendrocyte cells  
1252 mature oligodendrocytes branch via OPCs that are in close proximity to OLTAPs and  
1253 OLaNSCs. (d) tSNE plots of proneuronal and prooligodendroglial lineage cells and  
1254 selected transcript expression in the early- and mid-stages of the oligodendrocyte  
1255 lineage. e Heatmap of the 13 analyzed clusters illustrating the highly enriched stage-  
1256 specific signatures. Stage color legend is presented in f. (f) Violin plots of selected  
1257 marker expression across the 13 clusters further demonstrating markers  
1258 specific/enriched in stage and lineage. Abbreviations: aNSC: activated neural stem  
1259 cell; MOL: mature oligodendrocyte; NB: neuroblast; NSC: neural stem cell; OLaNSC:  
1260 oligodendroglial activated neural stem cell; OLpNSC: oligodendroglial primed neural  
1261 stem cell; OLqNSCI: oligodendroglial quiescent neural stem cell (subtype I);  
1262 OLqNSCII: oligodendroglial quiescent neural stem cell (subtype II); OLTAP:

1263 oligodendroglial transiently amplifying progenitor; OPC: oligodendrocyte precursor  
1264 cell; pNSC: primed neural stem cell; qNSCI: quiescent neural stem cell (subtype I);  
1265 qNSCII: quiescent neural stem cell (subtype II).

1266

## 1267 **Figure 2**

1268 Pathway and mechanistic analysis of the oligodendrocyte lineage. (a) Dot plot of the  
1269 most highly enriched/significant (“Sig” in plot) signaling pathways, organized  
1270 alphabetically from top to bottom in the 2 lineages. (b) A time course of the top 5  
1271 most enriched biological processes in each of the 7 clusters in the oligodendrocyte  
1272 lineage. Point size in plots reflects significance. Sig = significance ( $p$ -value).  
1273 Abbreviations: aNSC: activated neural stem cell; MOL: mature oligodendrocyte; NB:  
1274 neuroblast; NSC: neural stem cell; OPC: oligodendrocyte precursor cell; pNSC:  
1275 primed neural stem cell; qNSCI: quiescent neural stem cell (subtype I); qNSCII:  
1276 quiescent neural stem cell (subtype II).

1277

1278

## 1279 **Figure 3**

1280 Cell cycle heterogeneity of oligodendroglial and neuronal lineage cells. (a)  
1281 Oligodendrocyte and neuronal lineage cells scored by Seurat for cell cycle  
1282 regression using canonical markers. Oligodendrocyte lineage cells are plotted  
1283 according to their pseudotime trajectory and overlaid displayed the phase of cycle of  
1284 each cell. (b) A summary displaying the percentage of cells in the 3 phases of cell  
1285 cycle and the dynamics of mid stages of either lineage shuttling between states. (c)  
1286 Ridge plot of oligodendrocyte and neuronal lineage cells illustrating the distribution of  
1287 signal in the S or G2M cell cycle phase. (d) The mid stages of oligodendroglial (light

1288 red) and neuronal lineage (light blue) expanded for S (*Pcna*, *Mcm6*) and G2M  
1289 (*Top2a*, *Mki67*) marker signal distribution in ridge plots. (e,f) Dot plots show pathway  
1290 and protein class identification of the mid stages in the oligodendrocyte lineage.  
1291 Green, light red and brown in OLaNSC labels quiescent, common to both stages and  
1292 S phase, respectively; light purple, light red and light brown label OLTAPs in G2M,  
1293 common to both and S phase, respectively. Terms are ranked according to their  
1294 highest significance (Sig; *p*-value) from top to bottom. Pathways in red font are  
1295 examined for revealing their signaling-to-transcriptional networks in Figure 7.  
1296 Abbreviations: aNSC: activated neural stem cell; MOL: mature oligodendrocyte; NB:  
1297 neuroblast; NSC: neural stem cell; OLaNSC: oligodendroglial activated neural stem  
1298 cell; OLpNSC: oligodendroglial primed neural stem cell; OLqNSCI: oligodendroglial  
1299 quiescent neural stem cell (subtype I); OLqNSCII: oligodendroglial quiescent neural  
1300 stem cell (subtype II); OLTAP: oligodendroglial transiently amplifying progenitor;  
1301 OPC: oligodendrocyte precursor cell; pNSC: primed neural stem cell; qNSCI:  
1302 quiescent neural stem cell (subtype I); qNSCII: quiescent neural stem cell (subtype);  
1303 TF: transcription factor.

1304

#### 1305 **Figure 4**

1306 Reconstruction of a GRN by merging of previously generated networks and  
1307 organization of stages in the oligodendrocyte lineage according to their pseudotime  
1308 coordinates. Networks assembled in Figure S6b and d, those published recently (see  
1309 description in results section) and additional transcription factor-target gene (TG)  
1310 interactions from CHIP-seq studies are processed for a larger network. transcription  
1311 factor expressed in 7 distinct stages are arranged according to their pseudotime  
1312 order and each node represents the relative numbers of transcription factors

1313 expressed in a given phase in the lineage. A separate grouping of transcription  
1314 factors expressed in both aNSCs and TAPs are plotted according to the average  
1315 trajectory coordinates between these 2 phases. The top 5 GO Biological Processes  
1316 in OPCs and mature oligodendrocytes are incorporated for identifying their  
1317 regulatory pathways. Irregularly expressed transcription factors are those which are  
1318 abundant in the neuronal lineage and additionally expressed along the  
1319 oligodendrocyte lineage. The entire GRN of the oligodendrocyte lineage, termed as  
1320 “AdultOLgenesis GRN”. Nodes in bold outer surface are characterized by high  
1321 protein-protein interactions. Green, red and grey interactions signify gene inhibition,  
1322 activation and unspecified interaction onto their target genes (TGs), respectively.  
1323 Legends for the AdultOLgenesis GRN are presented in Figure 5 and 6.  
1324 Abbreviations: aNSC: activated neural stem cell; GRN: gene regulatory network;  
1325 MOL: mature oligodendrocyte; NB: neuroblast; NSC: neural stem cell; OLaNSC:  
1326 oligodendroglial activated neural stem cell; OLpNSC: oligodendroglial primed neural  
1327 stem cell; OLqNSCI: oligodendroglial quiescent neural stem cell (subtype I);  
1328 OLqNSCII: oligodendroglial quiescent neural stem cell (subtype II); OLTAP:  
1329 oligodendroglial transiently amplifying progenitor; OPC: oligodendrocyte precursor  
1330 cell; TF: transcription factor; TG: target gene.

1331

## 1332 **Figure 5**

1333 Gene regulatory interactions in substages of the oligodendrocyte lineage and the  
1334 predicted effects of key transcription factors in each stage. (a-f) Summaries of the  
1335 GRNs in each stage showing downstream gene regulation propagation. Edges and  
1336 nodes reflect the relative numbers of gene regulatory interactions and numbers of  
1337 transcription factor expressed in each stage, respectively. (g-l) The downstream

1338 gene regulatory interactions of selected transcription factors are quantified by  
1339 propagating the transcription factor most highly ranked in the oligodendrocyte  
1340 lineage and a transcription factor that is commonly expressed in a defined stage. In  
1341 g, *Olig2* and *Sox10* are probed for their downstream target (designated as  
1342 secondary, 2°), the subsequent downstream targets (including both genes in the GO  
1343 Biological Processes and additional transcription factors) to the tertiary genes (3°).  
1344 The transcription factor-target interactions quantified are plotted as a percentage  
1345 versus the total numbers of genes/gene regulatory interactions from the entire  
1346 reconstructed GRN. For each stage, the 2 highly ranked transcription factors and  
1347 their direct target genes are shown as subnetworks from the entire GRN.  
1348 Abbreviations: aNSC: activated neural stem cell; GRN: gene regulatory network;  
1349 MOL: mature oligodendrocyte; NB: neuroblast; NSC: neural stem cell; OLaNSC:  
1350 oligodendroglial activated neural stem cell; OLpNSC: oligodendroglial primed neural  
1351 stem cell; OLqNSCI: oligodendroglial quiescent neural stem cell (subtype I);  
1352 OLqNSCII: oligodendroglial quiescent neural stem cell (subtype II); OLTAP:  
1353 oligodendroglial transiently amplifying progenitor; OPC: oligodendrocyte precursor  
1354 cell; TF: transcription factor; TG: target gene.

1355

## 1356 **Figure 6**

1357 Mapping the impact of Signaling/PANTHER pathways onto GRNs. (a) PANTHER  
1358 pathways from previous GO analyses were used to filter out transcription factors  
1359 associated with each pathway term and their propagation onto the GRN were  
1360 quantified and represented as a percentage compared to *Olig2/Sox10* (Figure 5g).  
1361 (b-g) Examples of PANTHER Pathway effects onto the reconstructed GRN where  
1362 dashed edges show the secondary effects of propagation compared to the direct

1363 effects of transcription factors associated with each pathway. Heatmaps show the  
1364 relative ranking of key transcription factors of each pathway (both direct and  
1365 secondary targets). Transcription factors highlighted in red, green and grey are those  
1366 that activate expression of genes in later stage oligodendrocytes, inhibit the  
1367 expression of genes in later stage oligodendrocytes and transcription factors that are  
1368 essential to pathways as general regulators, respectively. Abbreviations: aNSC:  
1369 activated neural stem cell; GRN: gene regulatory network; MOL: mature  
1370 oligodendrocyte; NB: neuroblast; NSC: neural stem cell; OLaNSC: oligodendroglial  
1371 activated neural stem cell; OLpNSC: oligodendroglial primed neural stem cell;  
1372 OLqNSCI: oligodendroglial quiescent neural stem cell (subtype I); OLqNSCII:  
1373 oligodendroglial quiescent neural stem cell (subtype II); OLTAP: oligodendroglial  
1374 transiently amplifying progenitor; OPC: oligodendrocyte precursor cell; TF:  
1375 transcription factor; TG: target gene.

1376 **Word Count: 1333**

1377

## 1378 **Funding**

1379 This work was supported by the German Research Council (DFG;  
1380 SPP1757/KU1934/2\_1, KU1934/5-1; AZ/115/1-1/Ve642/1-1), the German Academic  
1381 Exchange Service (DAAD), the Swiss National Funds (P300PA\_171224). PK: This  
1382 study was supported by the Deutsche Forschungsgemeinschaft (DFG; AZ115/1-1).  
1383 Research on myelin repair and neuroregeneration has also been supported by the  
1384 Christiane and Claudia Hempel Foundation for clinical stem cell research, DMSG  
1385 Ortsvereinigung Düsseldorf und Umgebung e.V., Stifterverband/Novartisstiftung and  
1386 the James and Elisabeth Cloppenburg, Peek & Cloppenburg Düsseldorf Stiftung.

1387 The MS Center at the Department of Neurology is supported in part by the Walter  
1388 and Ilse Rose Foundation. FC was supported in part by NEURON-ERANET  
1389 (01EW1604) and DFG (CRC1080) awards to Prof Benedikt Berninger (UMC Mainz)  
1390 and by the Inneruniversitäre Forschungsförderung of the University Medical Center  
1391 of Johannes Gutenberg University Mainz. AB was supported by grants from the MS  
1392 Society UK, BBSRC and MRC.

### 1393 **List of abbreviations**

1394 aNSC: activated neural stem cell; CNS: central nervous system; DEGs: differentially  
1395 expressed genes; GO: gene ontology GRN: gene regulatory network; MOL: mature  
1396 oligodendrocyte; NB: neuroblast; NSC: neural stem cell; oligodendrocyte:  
1397 oligodendrocyte; OLaNSC: oligodendroglial activated neural stem cell; OLpNSC:  
1398 oligodendroglial primed neural stem cell; OLqNSCI: oligodendroglial quiescent  
1399 neural stem cell (subtype I); OLqNSCII: oligodendroglial quiescent neural stem cell  
1400 (subtype II); OLTAP: oligodendroglial transiently amplifying progenitor; OPC:  
1401 oligodendrocyte precursor cell; PANTHER: protein annotation through evolutionary  
1402 relationship; PCA: principal component analysis; pNSC: primed neural stem cell;  
1403 qNSCI: quiescent neural stem cell (subtype I); qNSCII: quiescent neural stem cell  
1404 (subtype II); SVZ: subventricular zone; TAP: transiently amplifying progenitor;  
1405 TETRAMER: TEmporal TRAnscription regulation Modeller TF: transcription factor;  
1406 TG: target gene; tSNE: t-Distributed Stochastic Neighbor Embedding.

1407



# Figure 1: Identification of lineage-specific NSCs/NPs.

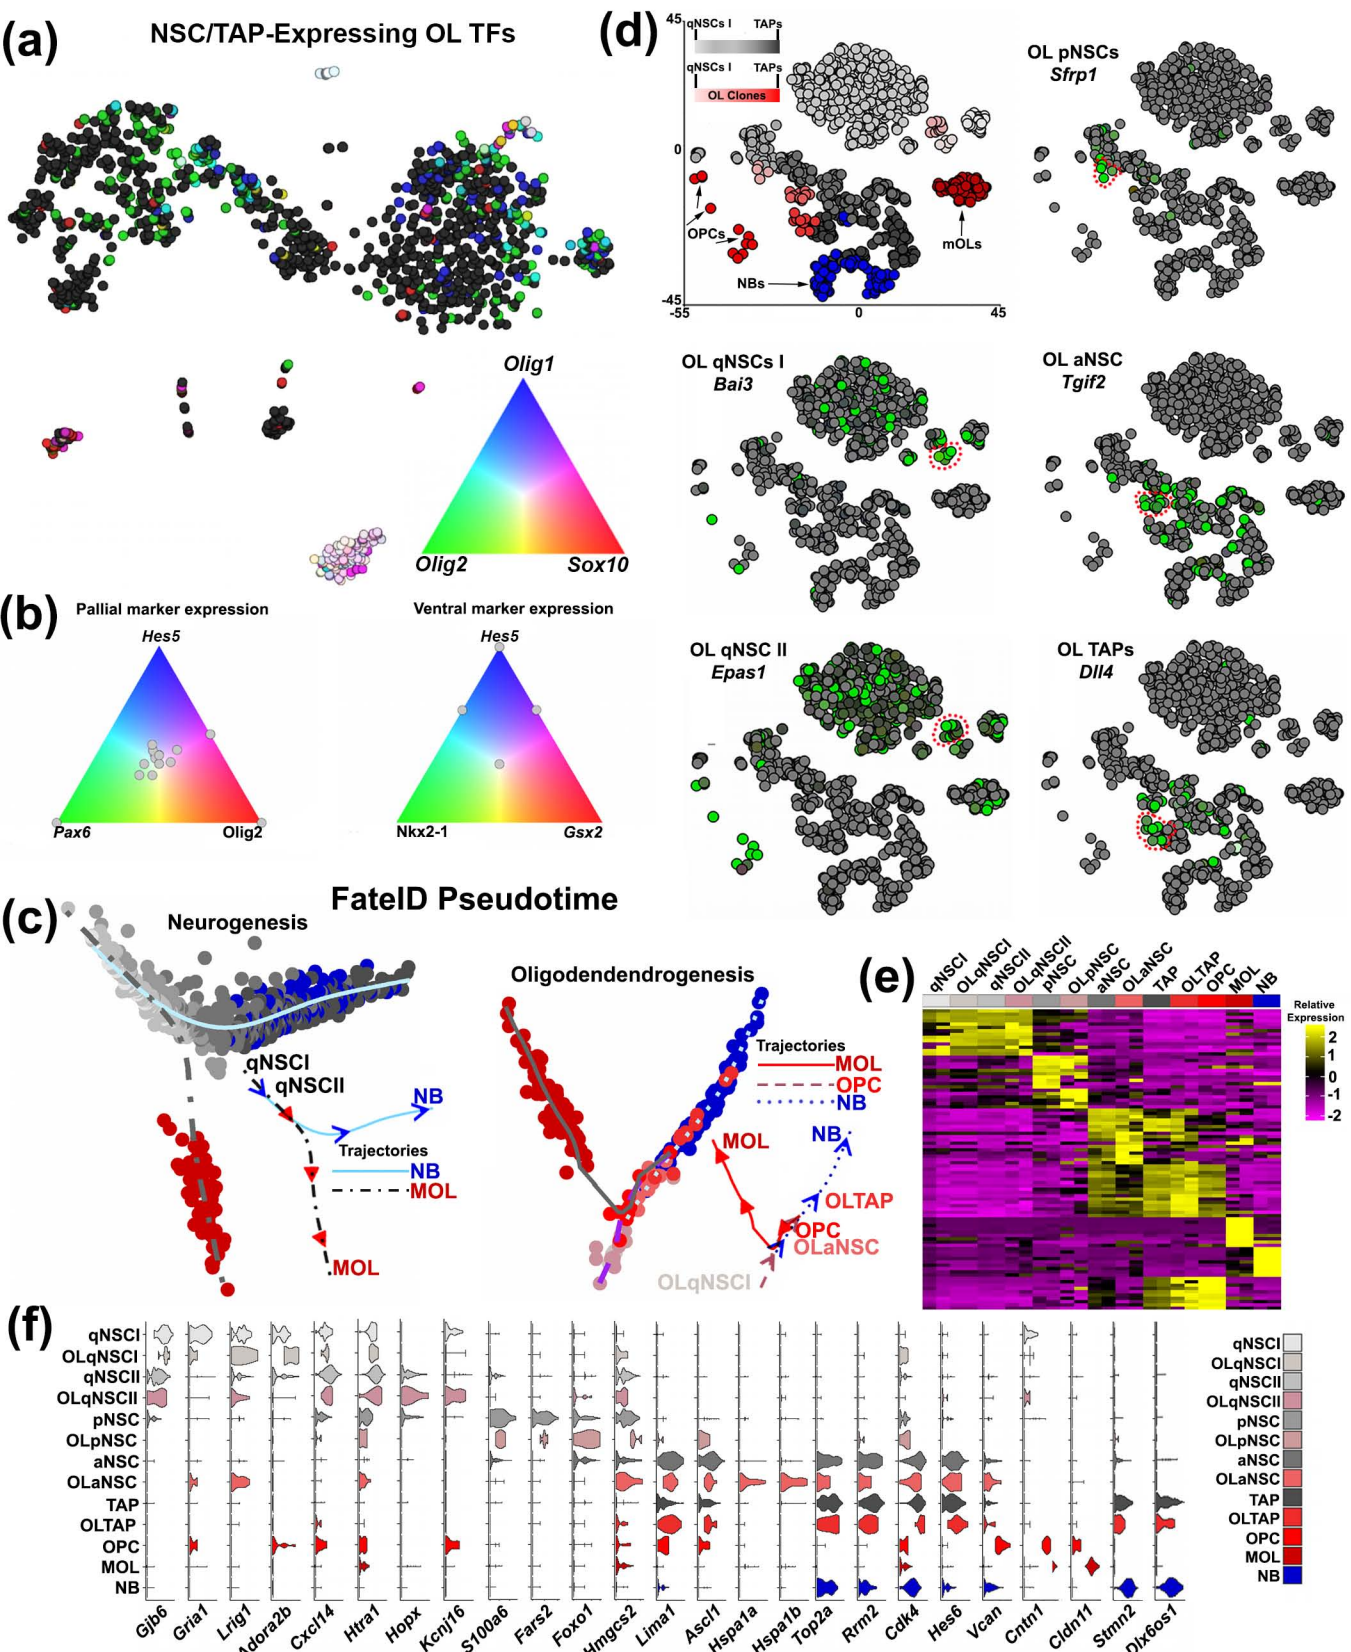



# Figure 2: Pathway and mechanistic analysis of the oligodendrocyte lineage.

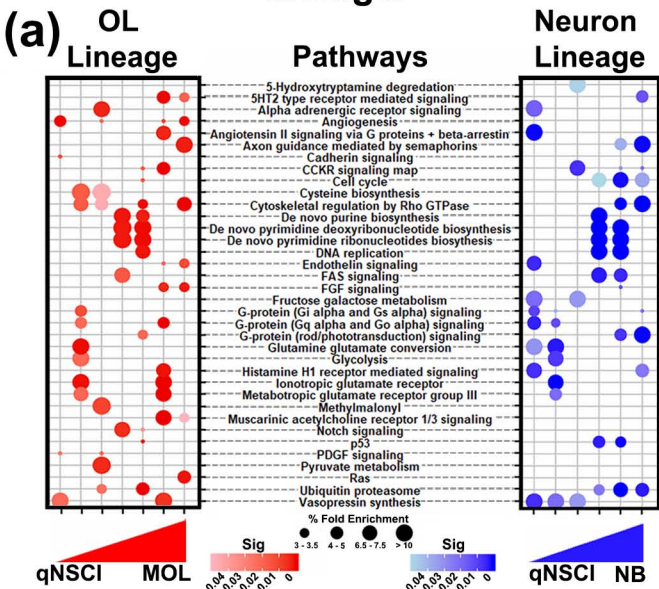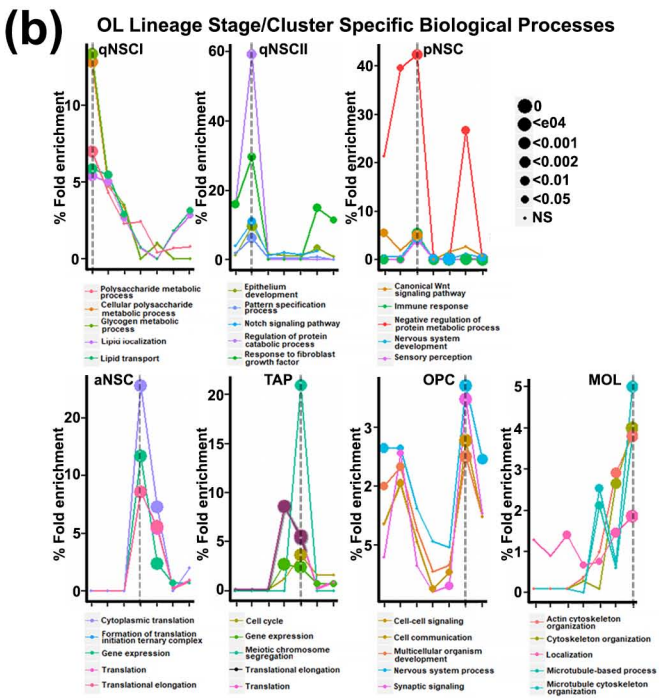

**Figure 3: Cell cycle heterogeneity of oligodendroglial and neuronal lineage cells.**

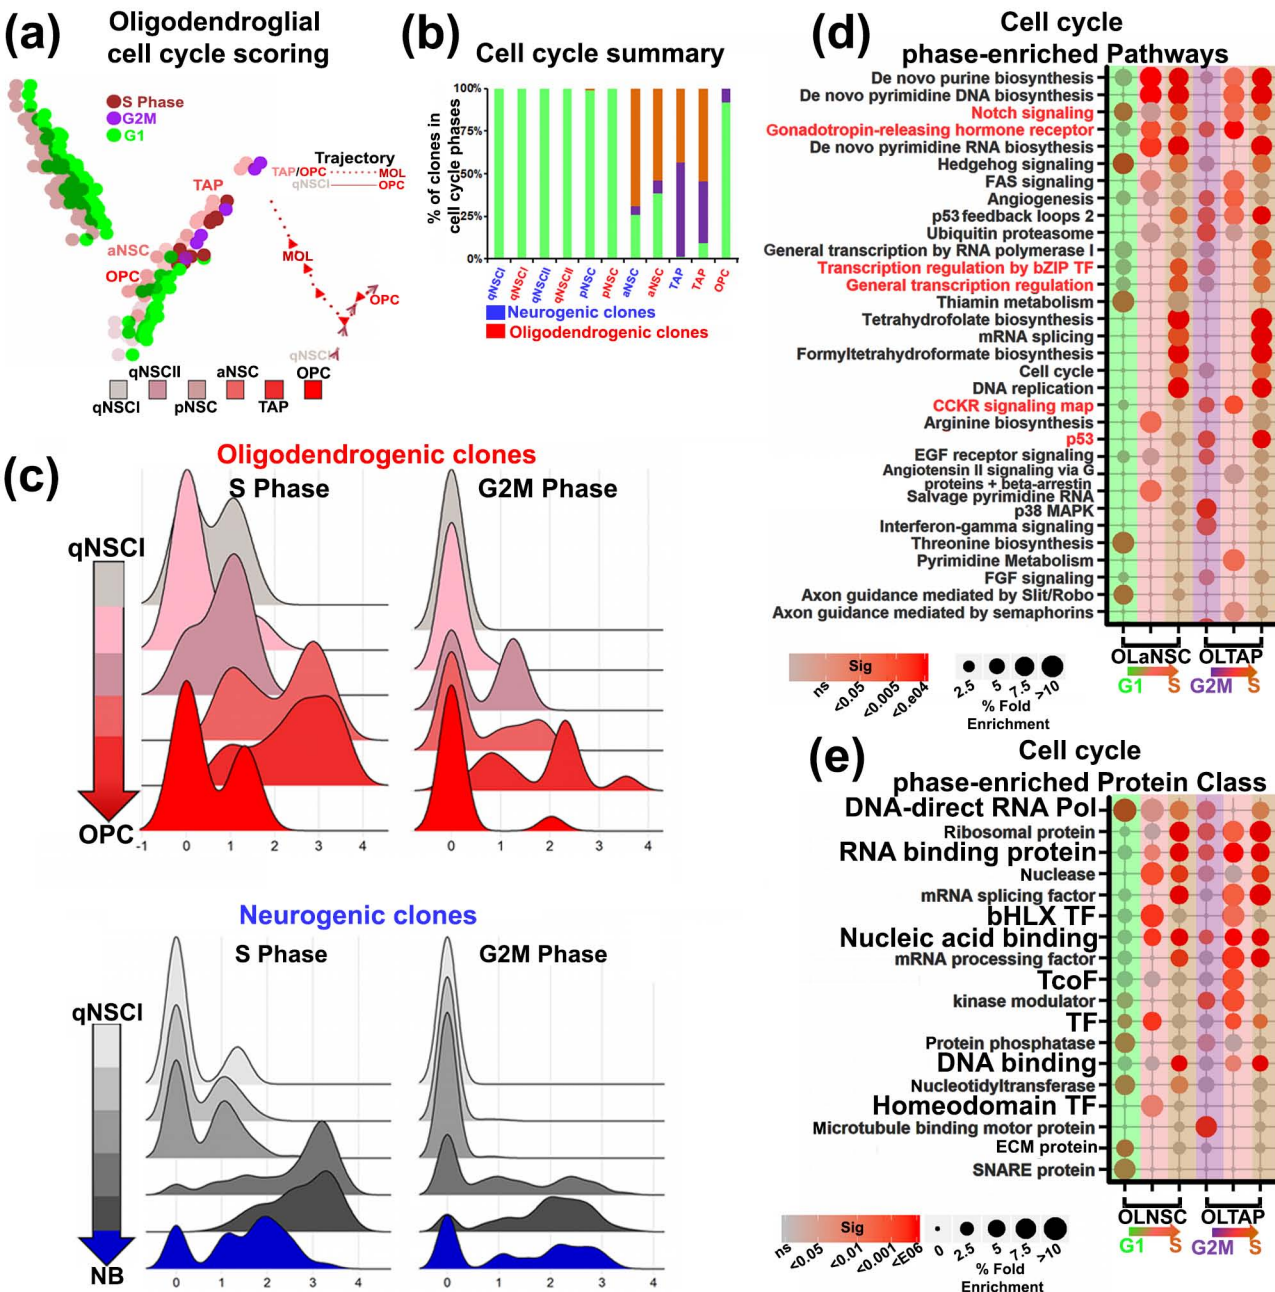

**Figure 4: Reconstruction of a GRN by merging of previously generated networks and organization of stages in the oligodendrocyte lineage according to their pseudotime coordinates.**

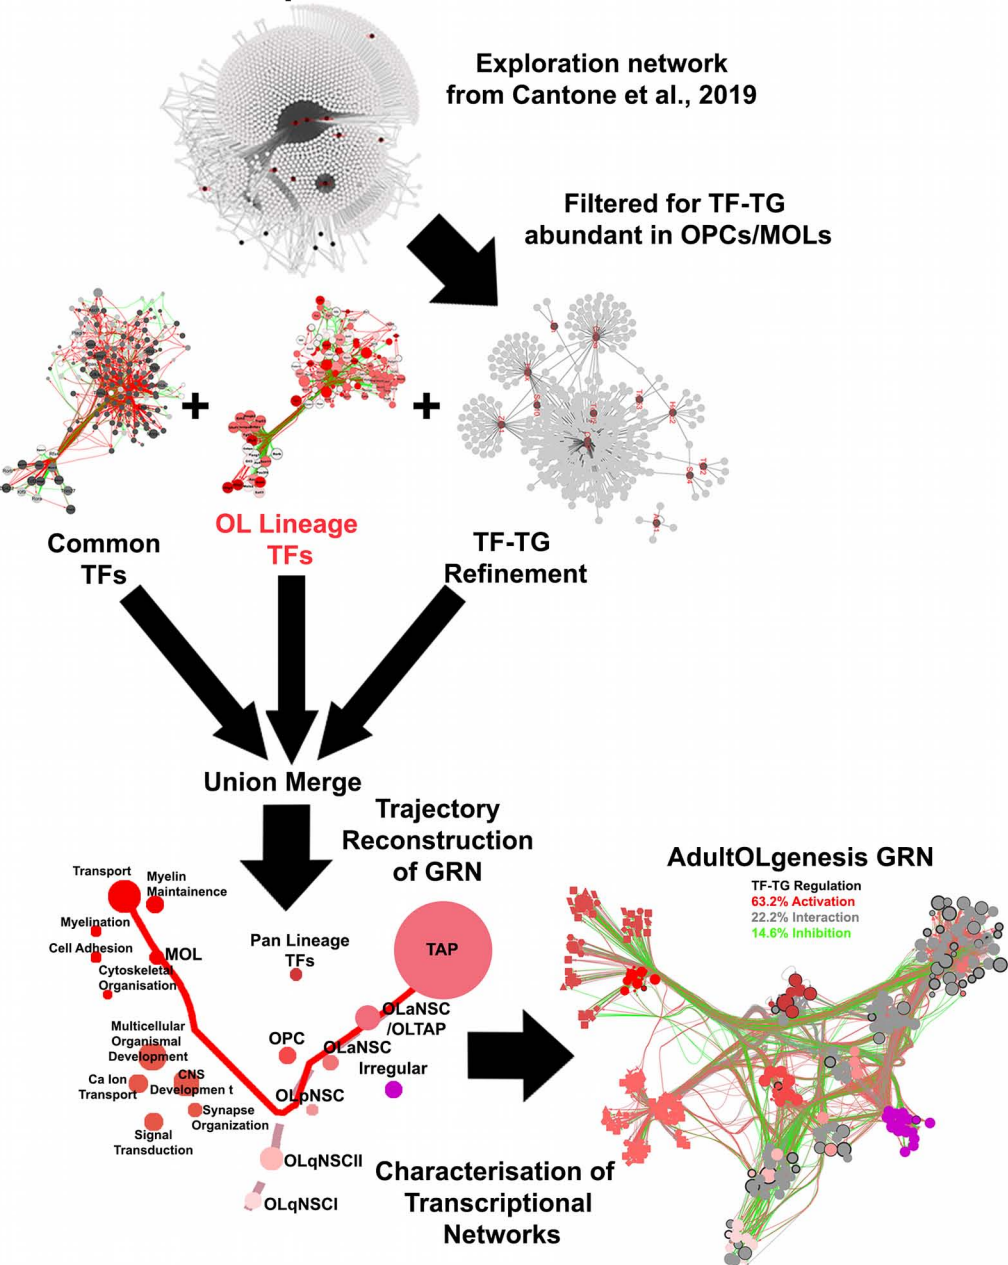



**Figure 5: Gene regulatory interactions in substages of the oligodendrocyte lineage and the predicted effects of key transcription factors in each stage.**

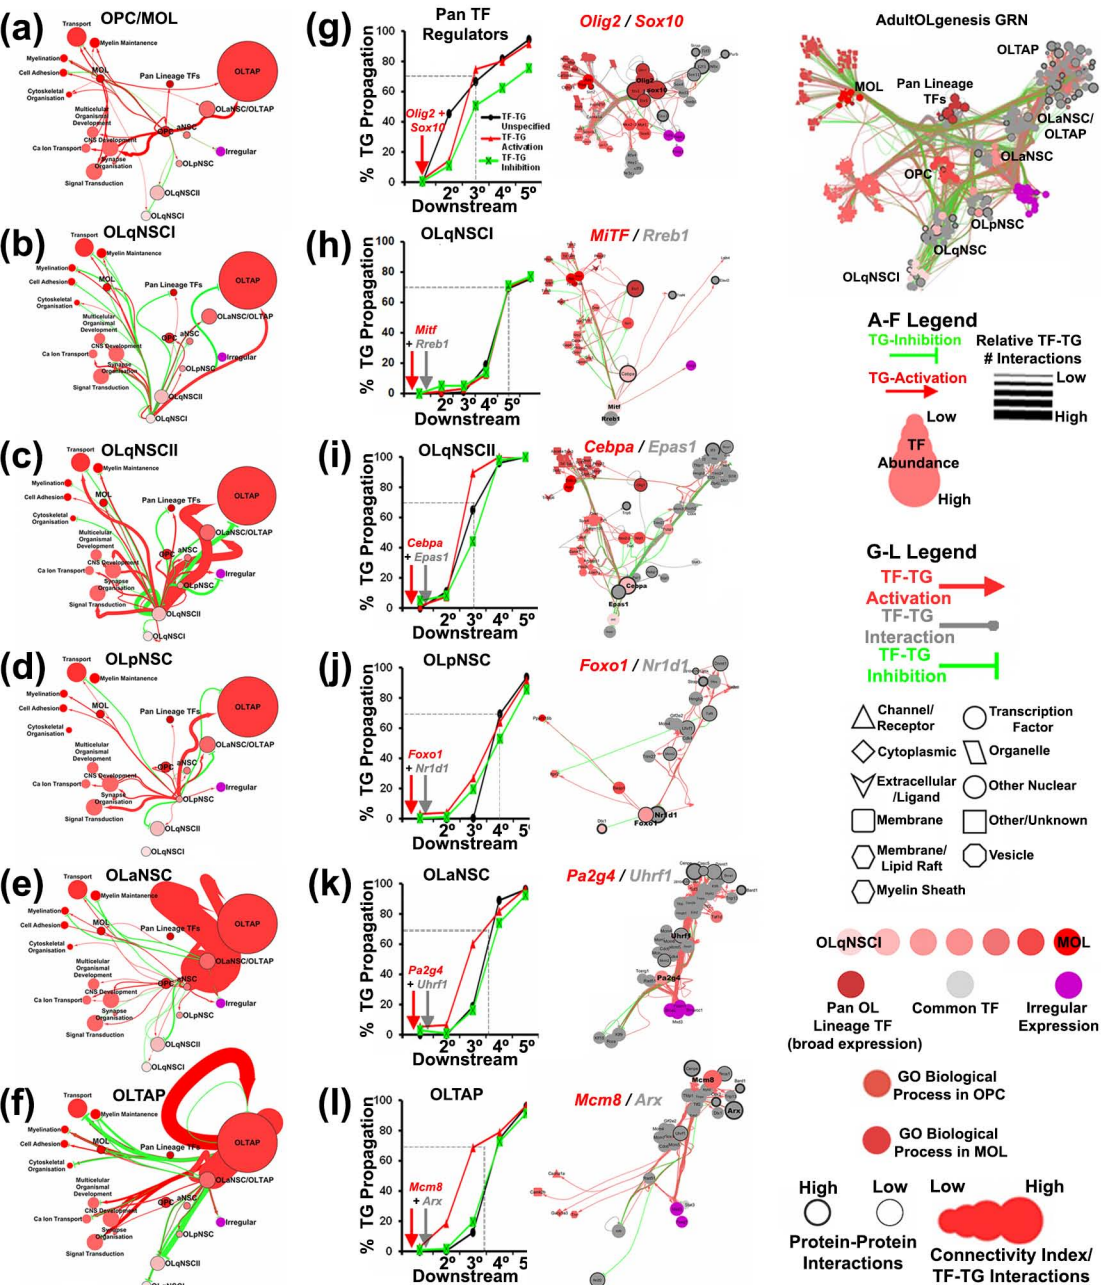

# Figure 6: Mapping the impact of Signaling/PANTHER pathways onto GRNs.

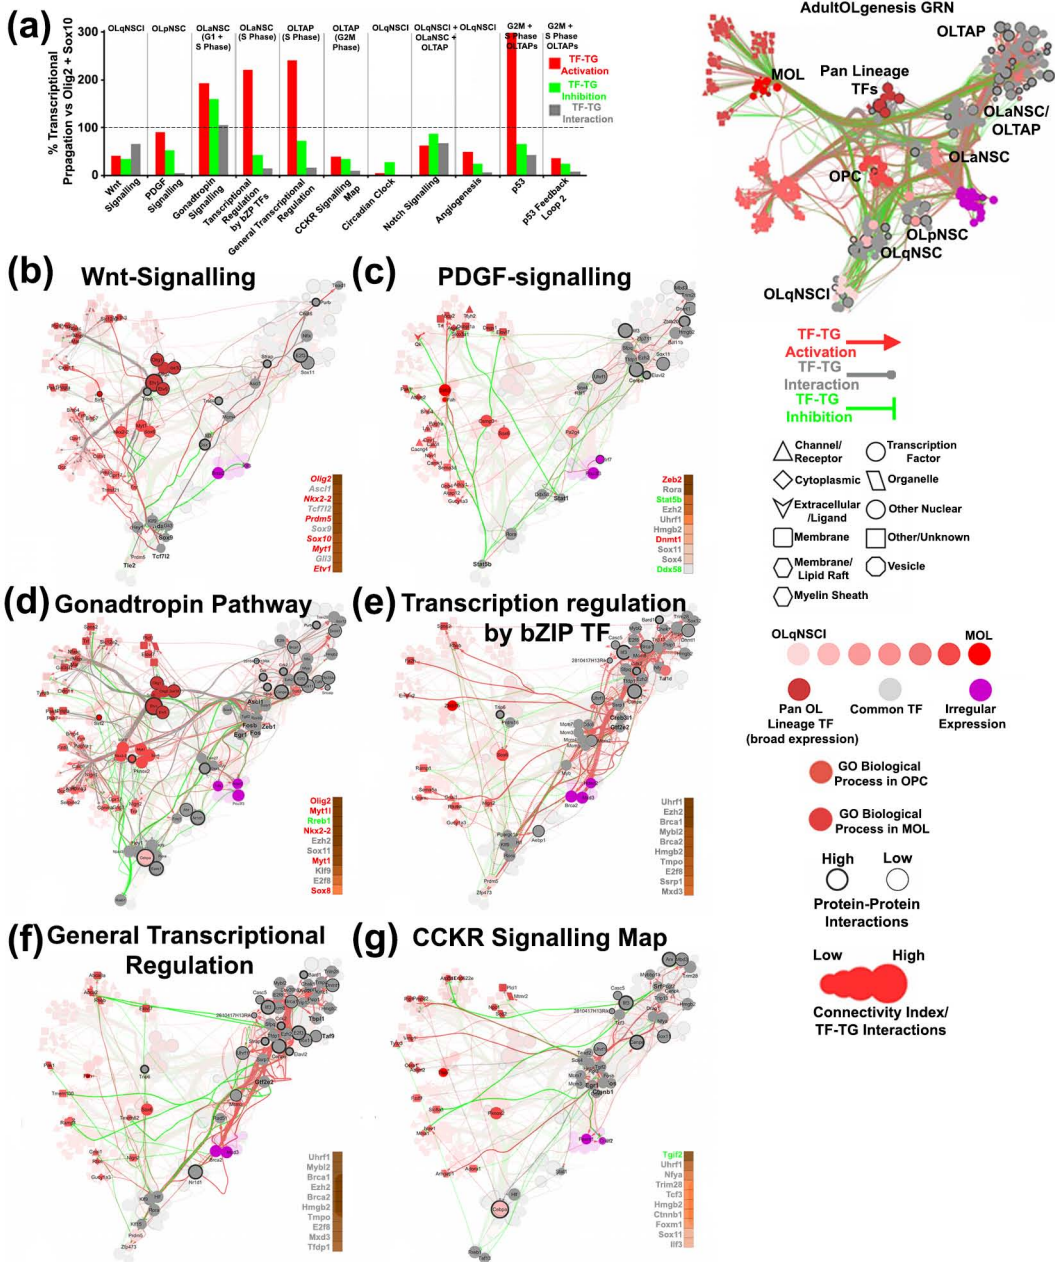

## Supporting Information

### Figure S1:

Summary of the datasets processed and overview of the transcription factor expression comparisons with postnatal bulk and adult single analysis. (a) Datasets re-processed illustrating the transgenic reporter and immunofluorescence strategy for isolating cells derived from the adult SVZ. Processed cells are shown as a tSNE plot. (b) Heatmap demonstrating that transcription factors expressed in single cells of OLqNSCI, OLqNSCII and OLpNSC (single cell early stage oligodendrocytes) group closely with postnatal dorsal bulk datasets. Lists of differentially expressed transcription factor-encoding genes from the indicated analyses were rendered as lists of binary values to allow grouping. (c) Clustergram illustrating transcriptomic differences and similarities of datasets generated from bulk versus single cell sequencing. Abbreviations: aNSC: activated neural stem cell; dTAPs: dorsal TAPs; dSVZ: dorsal subventricular zone; N: neuronal; NB: neuroblast; NSC: neural stem cell; oligodendrocyte: oligodendrocyte; OL: oligodendroglial; OPC: oligodendrocyte precursor cell; PANTHER: protein annotation through evolutionary relationship; PCA: principal component analysis; qNSC: quiescent neural stem cells; TAP: transiently amplifying progenitor.

### Figure S2:

Stage and cell specific marker expression across single cells in tSNE plots. (a) Constant *Gapdh* expression levels across cell types studied. (b-g) Selected markers of stage-specific markers, including pan-early NSC populations (*Hes5* qNSC-pNSC) and neuroblasts (*Dcx*). (i-l) Landmark markers of oligodendrocytes. Abbreviations: mOL: mature oligodendrocyte; NSC: neural stem cell; OPC: oligodendrocyte precursor cell; pNSC: primed neural stem cell; qNSCI: quiescent neural stem cell (subtype I); qNSCII: quiescent neural stem cell (subtype II); TAP: transiently amplifying progenitor.

### Figure S3:

Stage-specific comparisons of oligodendrocyte lineage versus neuronal lineage for PANTHER Protein Class and Pathways. (a-e) Cluster enriched genes for the oligodendroglial (red throughout) and neuronal lineage (blue throughout) for each stages analysed were compared for Panther Protein Class and Pathways. The overlapping genes (grey throughout) in each stage were included in the analysis. Ontology terms enriched in the oligodendrocyte lineage, neuronal lineage and common to both lineages are highlighted in red, blue and black text, respectively. Abbreviations: NSC: neural stem cell; pNSC: primed neural stem cell; qNSCI: quiescent neural stem cell (subtype I); qNSCII: quiescent neural stem cell (subtype II); TAP: transiently amplifying progenitor; TF: transcription factor.

### Figure S4:

Temporal PANTHER Pathway enrichment in the oligodendrocyte lineage. A time course of selected pathways enriched in the oligodendrocyte lineage from the PANTHER analysis shows enrichment of mechanisms during the course of oligodendrogenesis. Red, grey and blue colours in Venn diagrams signify, oligodendroglial, intersect (common), and neuronal lineage cells, respectively. A few pathways such as Angiogenesis and Notch signalling for example show enrichment in defined stages. Terms have been shorted/abbreviated to fit.

### Figure S5:

Temporal Transcriptional Regulation in the oligodendrocyte lineage. Protein class terms abundant in the 3 stages in Figure S4 are expanded further as a heatmap for representing modes of transcription factors regulating the oligodendrocyte lineage. TF: transcription factor.

### Figure S6:

Transcription factor expression in oligodendroglia points to shifts in gene regulatory network states as major drivers of differentiation. (a) Transcription factors expressed in the oligodendrocyte lineage (light red from OLqNSCI to dark red for mature oligodendrocytes) and expressed in both lineages, i.e. commonly expressed transcription factors between the 2 lineages (light grey from qNSCI to dark grey for TAPs) are ranked according to their heat diffusion impact for downstream genetic interactions, physical interactions with other transcription factors and combined. (b-d) Using gene lists for the defined stages for transcription factor expression, those transcription factors expressed in both lineages from qNSCI to TAP stage (b), enriched in the neuronal lineage from qNSCI to the NB stage e and oligodendroglial lineage from OLqNSCI to OPC stage (d). The size of each transcription factor node in the network is relative to its transcription factor-TG (target gene) connectivity index. The numbers of activating (red) or inhibiting (green) interactions from each network are shown as a percentage. (e) The top 25 transcription factors with the highest connectivity index are displayed as heatmaps for the numbers of regulatory interactions with TGs. Heatmaps show darker to lighter colour relative to the numbers of genes regulated by each transcription factor. (f) Examples of higher-, medium- and low-ranking transcription factors. See Figure 4d for description of the legend. Abbreviations: MOL: mature oligodendrocyte; NB: neuroblast; NSC: neural stem cell; OL: oligodendrocyte; OLaNSC: oligodendroglial activated neural stem cell; OLpNSC: oligodendroglial primed neural stem cell; OLqNSCI: oligodendroglial quiescent neural stem cell (subtype I); OLqNSCI: oligodendroglial quiescent neural stem cell (subtype II); OLTAP: oligodendroglial transiently amplifying progenitor; OPC: oligodendrocyte precursor cell; pNSC: primed neural stem cell; qNSCI: quiescent neural stem cell (subtype I); TAP: transiently amplifying progenitor; transcription factor; TG: target gene.

### Figure S7:

Diffusion ranking for transcription factor functional relationships. (a) Transcription factors expressed in the oligodendrocyte lineage from OLqNSC to MOL stage and those that are common to both oligodendroglial and neuronal lineages were first converted to human gene symbols for maximising the data gathered (information on human gene orthologs are more numerous). (b,c) GeneMania was used to gather functional information on genetic and physical interactions (protein-protein interactions) for the genes sampled. All genes were initially assembled on a network without prior arrangement and the heat diffusion algorithm applied separately for genetic and physical interactions. Node sizes in the networks reflect diffusion rankings for the two combined parameters. Network organized using the CoSE algorithm for force directing nodes within the defined stages. (d) Grading of transcription factors within each stage. Larger to smaller node sizes are relative to the diffusion ranking scores of combined genetic and physical diffusion. Border thickness of each transcription factor directly proportional to protein-protein



interaction number. Transcription factors labels are shown for those prioritised and additional transcription factors shown are expressed in the oligodendrocyte lineage with significant expression, whilst the remaining are derived from more stringent criteria. Abbreviations: MOL: mature oligodendrocyte; NSC: neural stem cell; OL: oligodendrocyte; OLaNSC: oligodendroglial activated neural stem cell; OLpNSC: oligodendroglial primed neural stem cell; OLqNSCI: oligodendroglial quiescent neural stem cell (subtype I); OLqNSCII: oligodendroglial quiescent neural stem cell (subtype II); OLTAP: oligodendroglial transiently amplifying progenitor; OPC: oligodendrocyte precursor cell; pNSC: primed neural stem cell; qNSCI: quiescent neural stem cell (subtype I); TAP: transiently amplifying progenitor; transcription factor.



**(a)**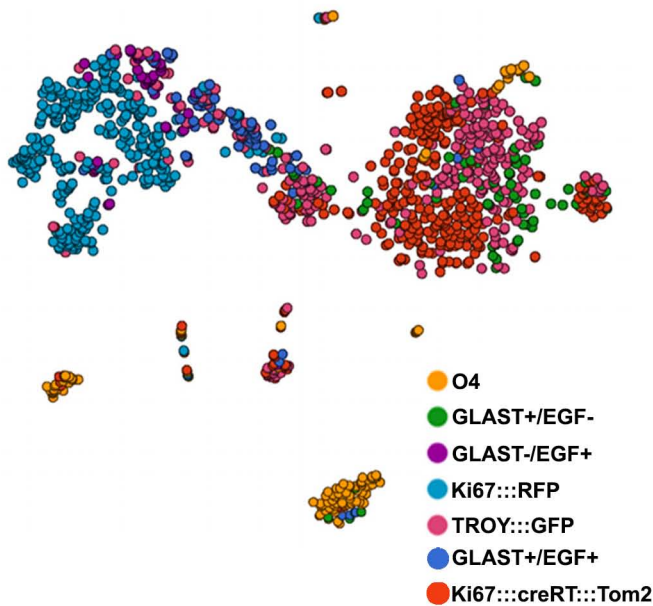**(b)**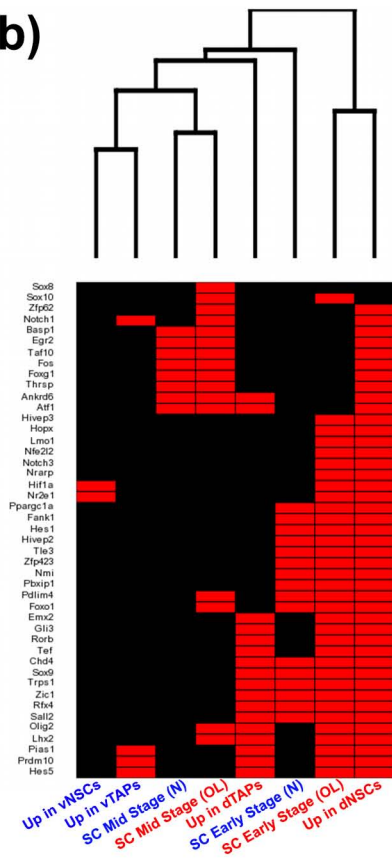**(c)**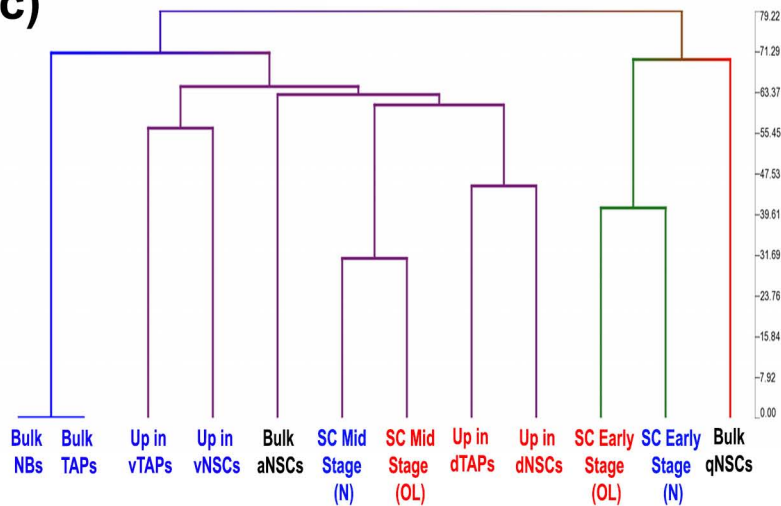

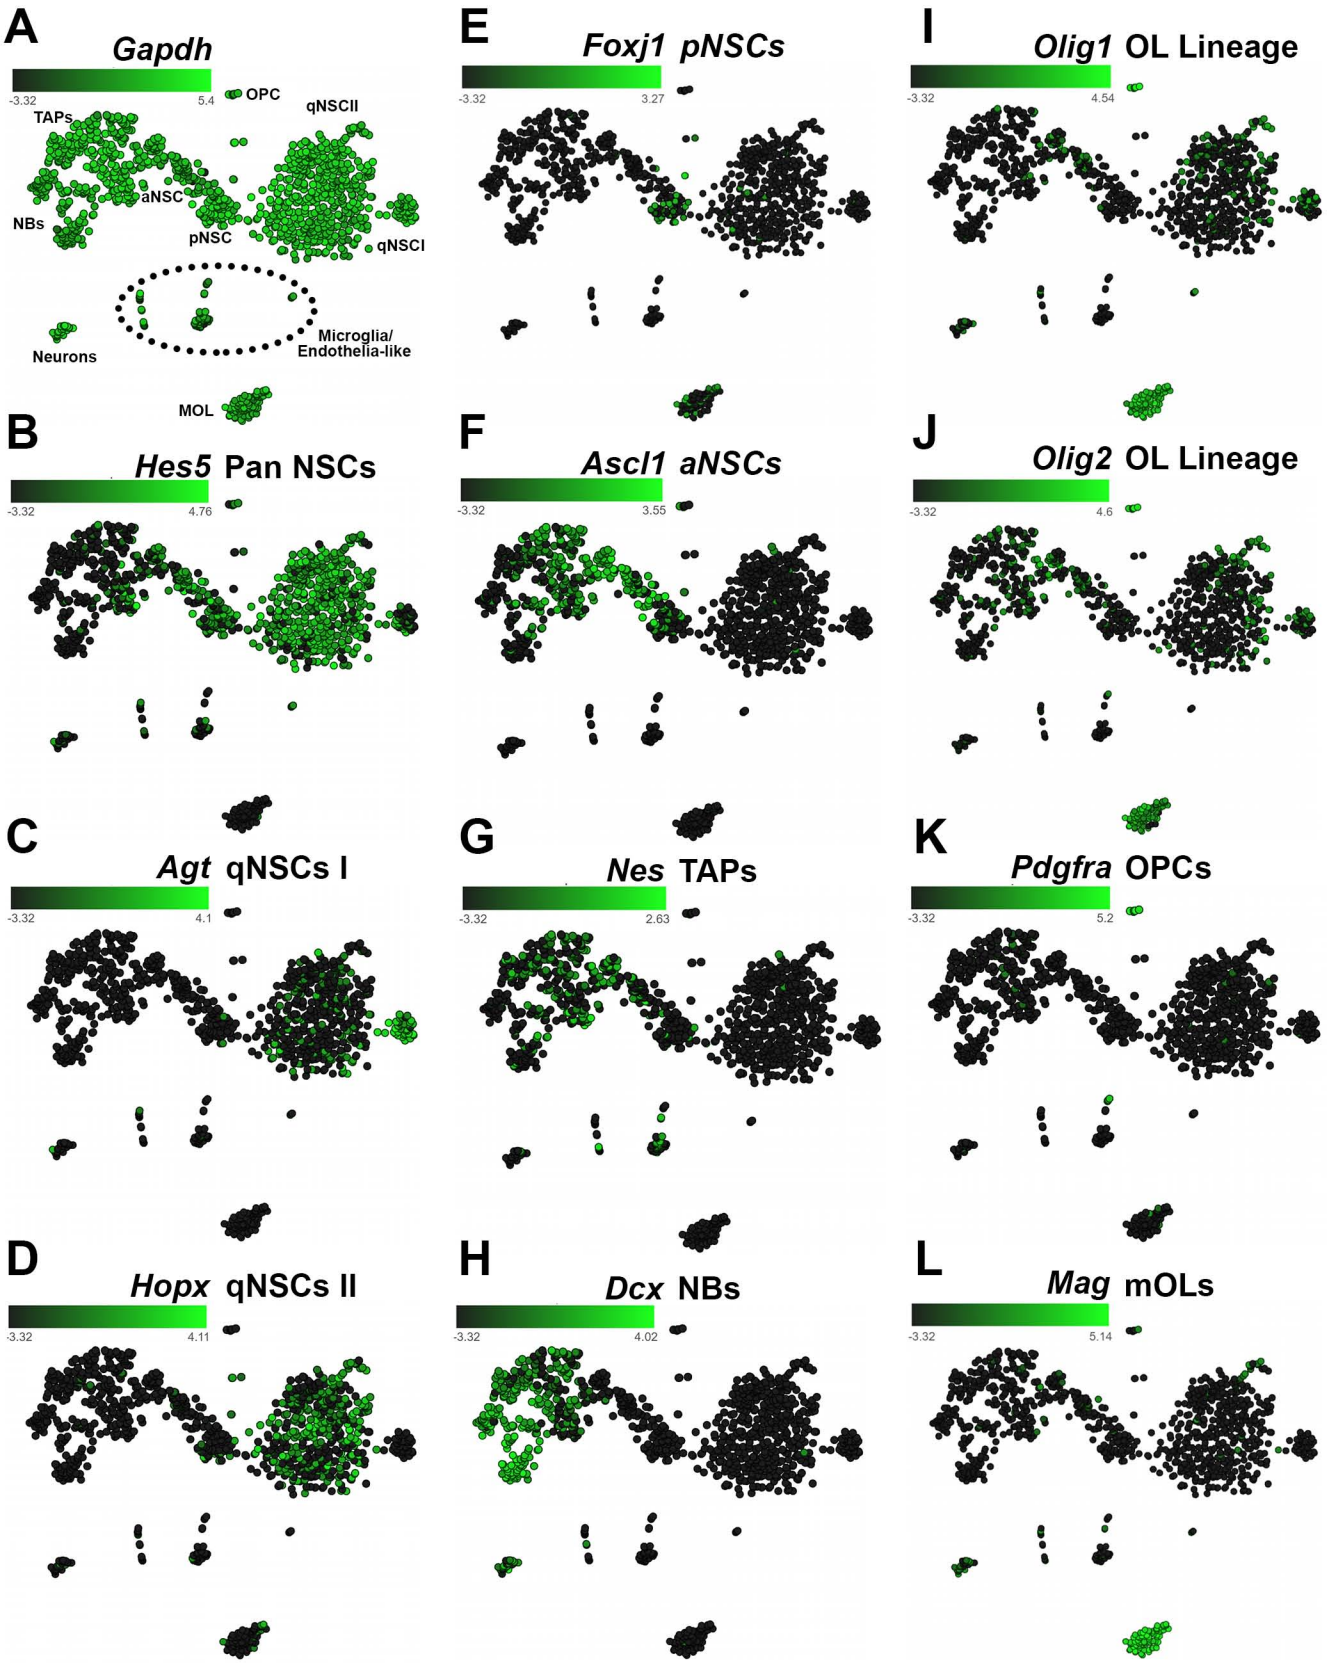

### (a) qNSCI

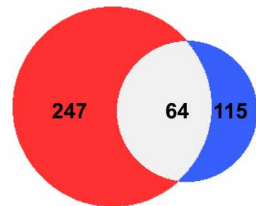

### Protein Class

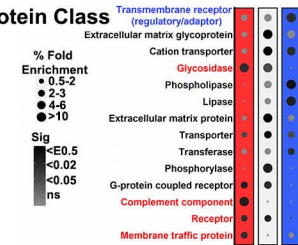

### Pathways

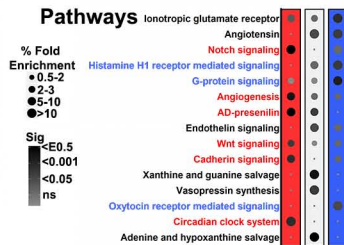

### (b) qNSCII

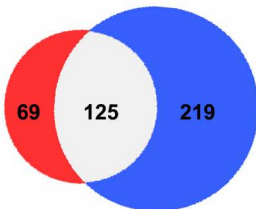

### Protein Class

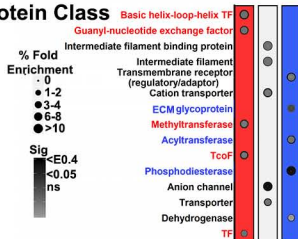

### Pathways

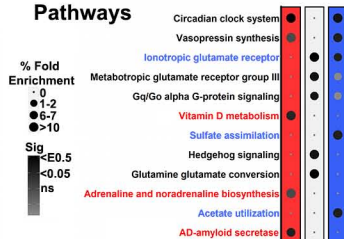

### (c) pNSC

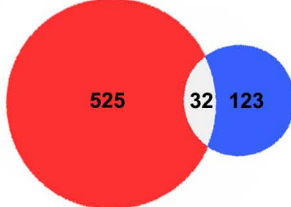

### Protein Class

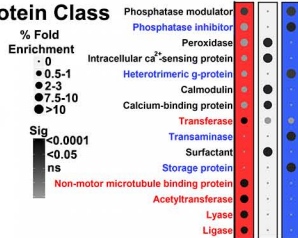

### Pathways

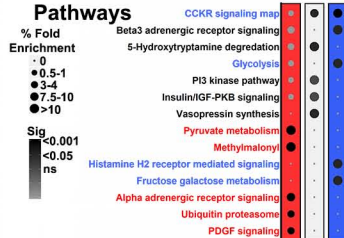

### (d) aNSC

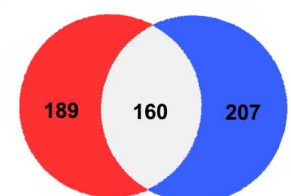

### Protein Class

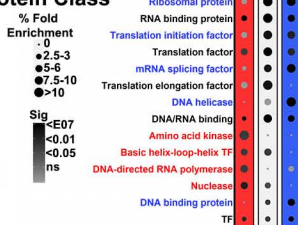

### Pathways

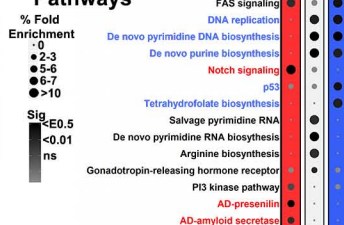

### (e) TAP

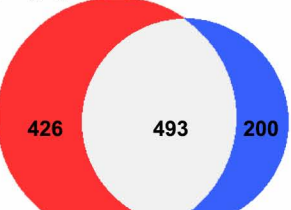

### Protein Class

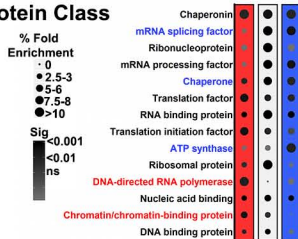

### Pathways

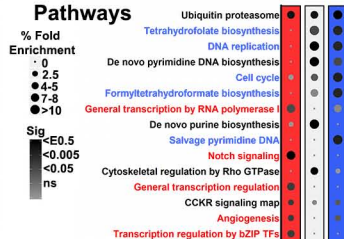

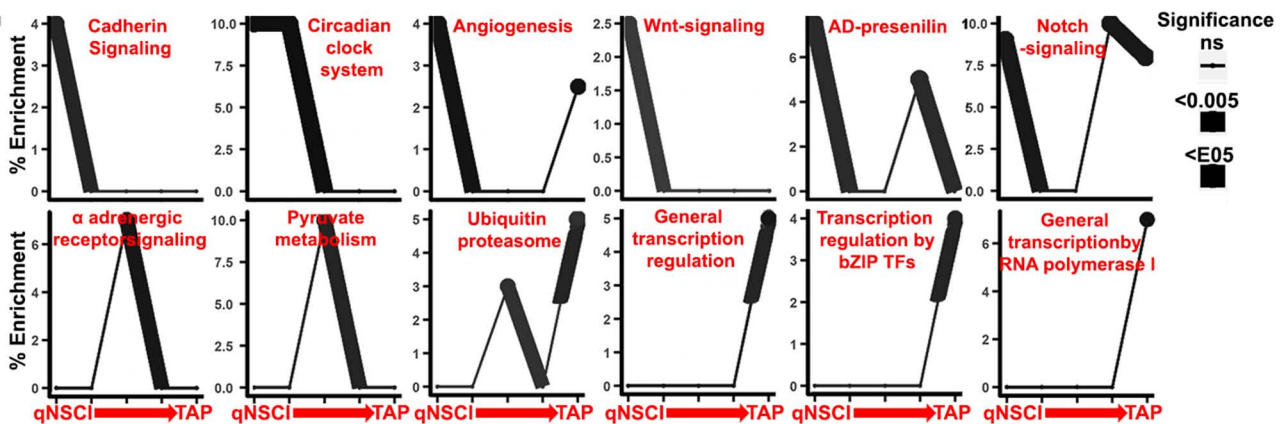





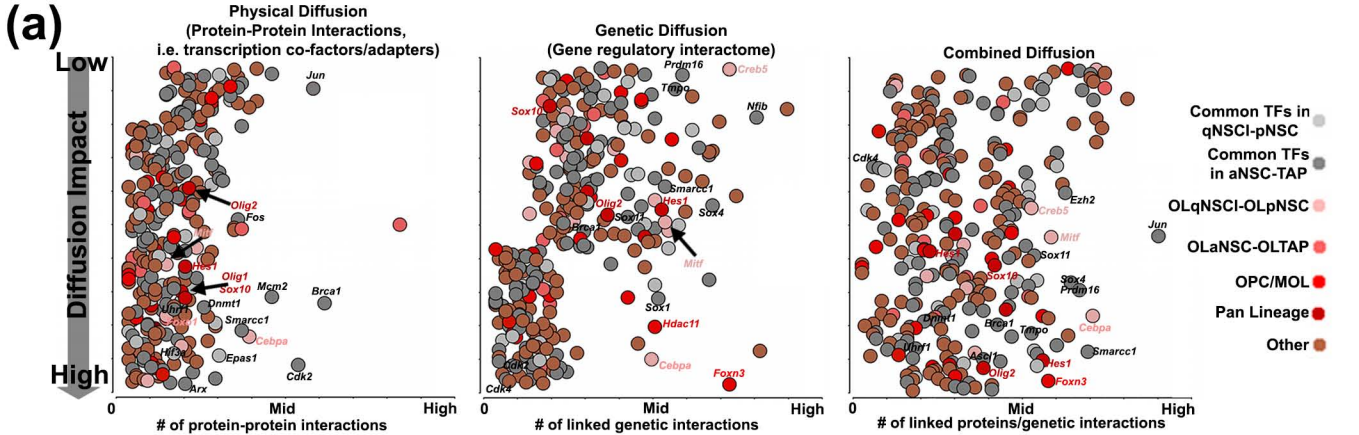

**(b) Common TF-TF Interactions**

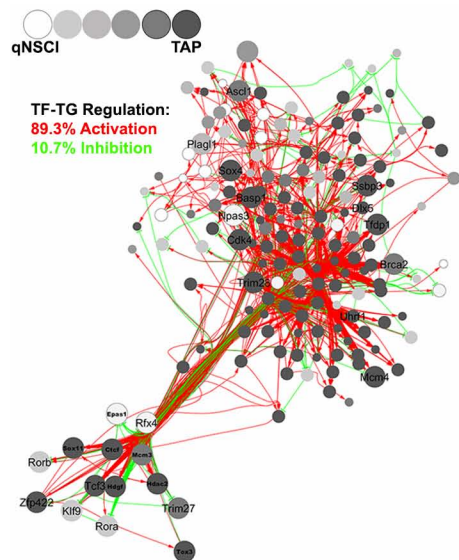

**(c) Neuronal lineage TF-TF Interactions**

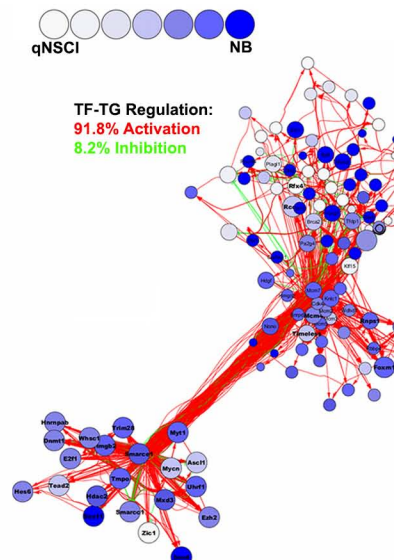

**(d) OL lineage TF-TF Interactions**

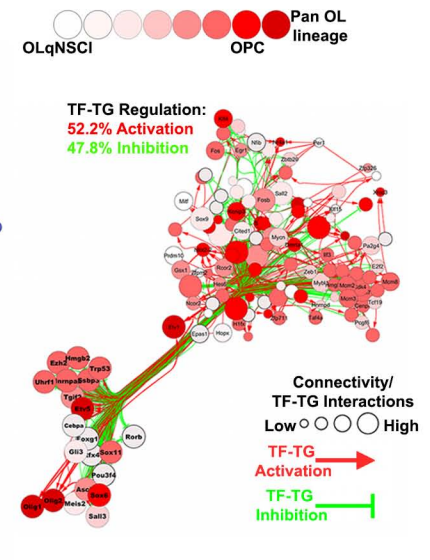

**(e) All TF-TG Interaction's**

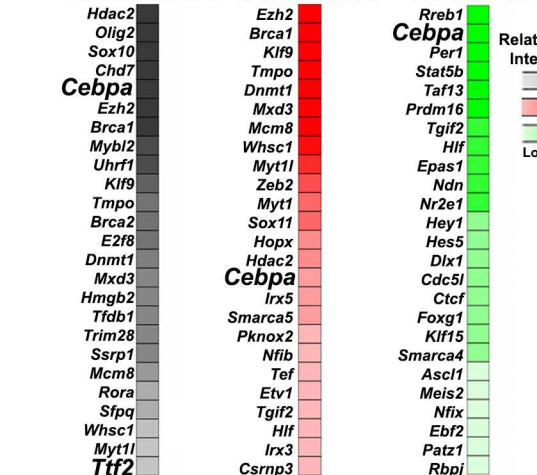

**(f)**

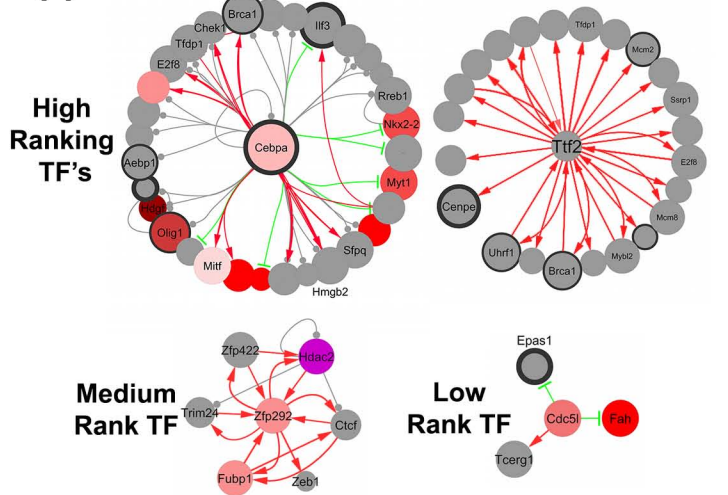

Overview of stage/lineage enriched TFs

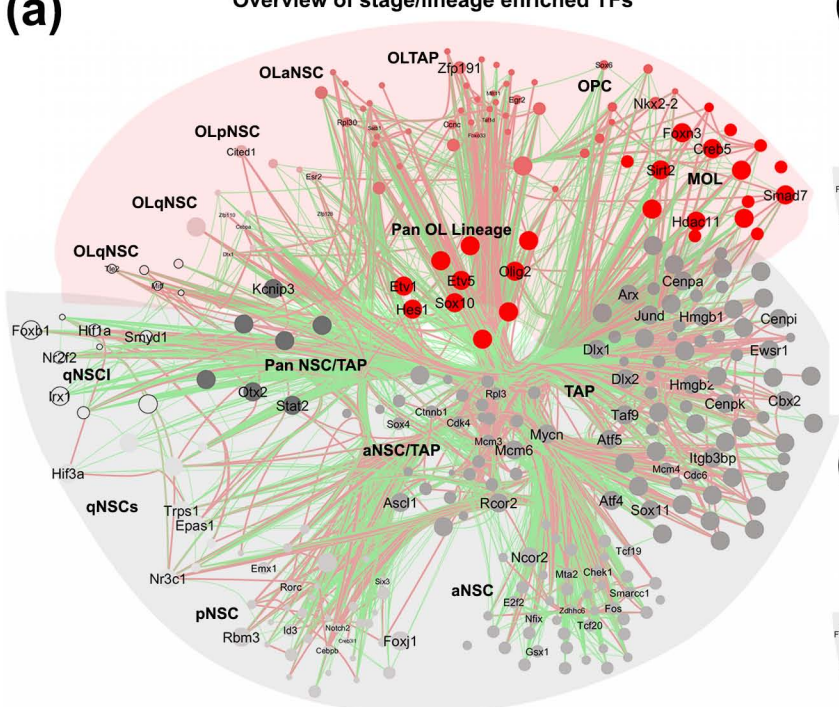

TF Protein-Protein Interactions

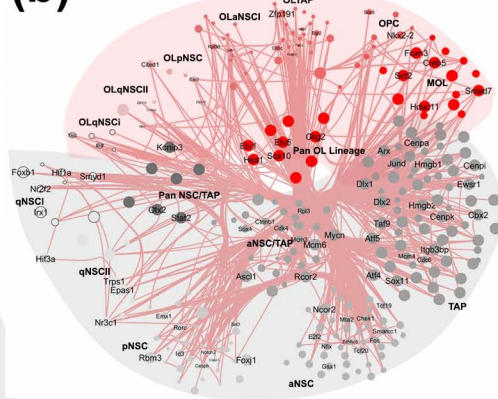

Broader Gene Regulatory Interactomes

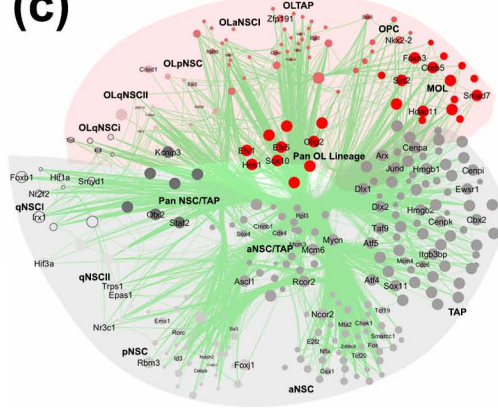

TF Ranking for Genetic and Protein-Protein Interactions  
**Oligodendrogenesis/Lineage Progression** →

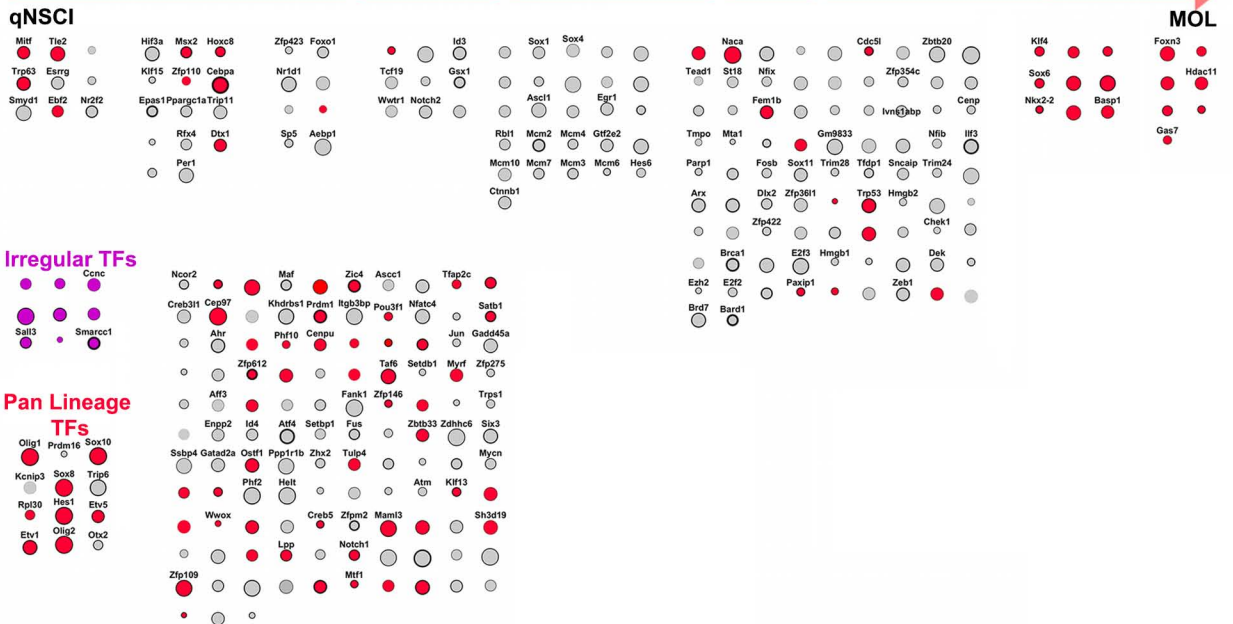

Source: https://www.biorxiv.org/content/10.1101/2020.12.18.423285v1.full.pdf
